# Supplementary material for: Artificial Intelligence for Screening of Multiple Retinal and Optic Nerve Diseases
Source: PubMed Central journal article supplement (PMC9066285; doi:10.1001/jamanetworkopen.2022.9960), 2022-05-03
Supplement: jamanetwopen-e229960-s001.pdf [file jamanetwopen-e229960-s001.pdf]

## Supplemental Online Content

Dong L, He W, Zhang R, et al. Artificial intelligence for screening of multiple retinal and optic nerve diseases. *JAMA Netw Open*. 2022;5(2):e229960.  
doi:10.1001/jamanetworkopen.2022.9960

### eMethods.

**eFigure 1.** The Overall Structure of Study

**eFigure 2.** Distribution of Images in Prospective Validation Dataset

**eFigure 3.** Performance of the RAIDS in Prospective Validation Dataset

**eFigure 4.** Heatmap Visualization of Referral Diabetic Retinopathy

**eFigure 5.** Heatmap Visualization of Referral Age-Related Macular Degeneration

**eFigure 6.** Heatmap Visualization of Referral Possible Glaucoma

**eFigure 7.** Heatmap Visualization of Pathological Myopia

**eFigure 8.** Heatmap Visualization of Retinal Vein Occlusion

**eFigure 9.** Heatmap Visualization of Macula Hole

**eFigure 10.** Heatmap Visualization of Epiretinal Macular Membrane

**eFigure 11.** Heatmap Visualization of Hypertensive Retinopathy

**eFigure 12.** Heatmap Visualization of Myelinated Fibers

**eFigure 13.** Heatmap Visualization of Retinitis Pigmentosa

**eFigure 14.** Performance Comparison Between RAIDS and Human Ophthalmologists in Identifying Multiple Retinal Diseases

**eFigure 15.** Performance of RAIDS-Human Ophthalmologist Combination in Identifying Multiple Retinal Diseases

**eTable 1.** Development Dataset Distributions of Retinal Diseases and Camera Manufacturers

**eTable 2.** Performance of the Retinal Artificial Intelligence Diagnosis System in the Internal Validation Dataset

**eTable 3.** Performance of the Retinal Artificial Intelligence Diagnosis System (RAIDS) in Prospective Validation Dataset

**eTable 4.** Performance of the Retinal Artificial Intelligence Diagnosis System in Identifying Multiple Retinal Diseases in East China

**eTable 5.** Performance of the Retinal Artificial Intelligence Diagnosis System in Identifying Multiple Retinal Diseases in North China

**eTable 6.** Performance of the Retinal Artificial Intelligence Diagnosis System Identifying Multiple Retinal Diseases in South China

**eTable 7.** Performance of the Retinal Artificial Intelligence Diagnosis System in Identifying Multiple Retinal Diseases in West China

**eTable 8.** Baseline Characteristics of Participants in the Reader Study

**eTable 9.** Performance of Human Ophthalmologists in Identifying Multiple Retinal Diseases in the Reader Study

**eTable 10.** K Scores Between Retinal Artificial Intelligence Diagnosis System and Different Groups of Human Experts in the Reader Study

**eTable 11.** Intergroup Correlation Between Ophthalmologists

**eTable 12.** Efficiency Analysis of the DL Algorithm vs Human Ophthalmologists in Identifying Multiple Retinal Diseases in the Reader Study

**eTable 13.** Performance of the Combination of Certified Ophthalmologists and the Retinal Artificial Intelligence Diagnosis System in the Reader Study

**eTable 14.** Performance of the Combination of Junior Retinal Specialists and the Retinal Artificial Intelligence Diagnosis System in the Reader Study

**eTable 15.** Performance of the Combination of Senior Retinal Specialists and the Retinal Artificial Intelligence Diagnosis System in the Reader Study

This supplemental material has been provided by the authors to give readers additional information about their work.

## eMethods.

### (a) Evaluation metric calculation

From the point of classification methods, RAIDS was essentially a multi-label classification system. Therefore, the evaluation of RAIDS followed the commonly-used evaluation method, which took the evaluation of each abnormality as binary-classification evaluation. The binary evaluation was derived from the concept of confusion matrix. For each kind of abnormality, if the abnormality was present in the ground truth of a sample image, then this image would be positive related to this abnormality, otherwise it was negative. So did the prediction. Having obtained the confusion matrix for each kind of abnormality, the metrics of accuracy, sensitivity and specificity were calculated following the formulas:

|    |      |     |     |
|----|------|-----|-----|
|    | Pred | neg | pos |
| GT |      |     |     |
|    | neg  | TN  | FP  |
|    | pos  | FN  | TP  |

$$acc = \frac{TN + TP}{TN + TP + FN + FP}$$

$$sens = \frac{TP}{TP + FN}$$

$$spec = \frac{TN}{TN + FP}$$

To be noted here, area under curve (AUC) was not applicable to the evaluation of RAIDS. RAIDS was based a multi-task multi-label classification model. For each sub-task, it was feasible to calculate AUC for each class or abnormality related to this sub-task. However, as some kinds of abnormalities were determined by two of the sub-tasks, e.g. macula hole was determined by both macula-branch and general-branch, which resulted in two possibilities for macula hole, it was theoretically infeasible to draw a two-dimensional ROC curve for the whole multi-task model, and neither do the AUC which was derived from ROC curve as the area under the curve.

## **(b) Diagnosis criteria of fundus images in health care screening**

- 1. Normal fundus:** Rosy optic disc, with the cup disc ratio of 0.2-0.6; the arteriovenous ratio between 2:3 and 1:2; no sign of bleeding and other obvious lesions; tessellation fundus; small drusen < 125  $\mu\text{m}$  in greatest linear diameter.
- 2. Referable diabetic retinopathy:** defined as a diabetic retinopathy severity level of moderate non-proliferative diabetic retinopathy or worse, diabetic macular edema.<sup>[1]</sup>
- 3. Referable AMD:** defined as the presence of intermediate AMD (numerous medium-sized drusen, 1 large drusen  $\geq 125 \mu\text{m}$  in greatest linear diameter; geographical atrophy; advanced AMD).<sup>[2]</sup>
- 4. Referable possible glaucoma:** defined as a ratio of vertical cup to disc diameter  $\geq 0.7$ , focal thinning or notching of the neuroretinal rim, optic disc hemorrhages, or localized retinal nerve fiber layer defects.<sup>[3]</sup>
- 5. Pathological myopia:** defined as diffuse chorioretinal atrophy or greater degree of atrophy.<sup>[4]</sup>
- 6. Retinal vein occlusion:** defined as intraretinal hemorrhages and dilated tortuous retinal vasculature. Both central retinal vein occlusion and branch retinal vein occlusion were labelled in this classification.<sup>[5]</sup>
- 7. Hypertensive retinopathy:** Obvious arterial narrowing with focal irregularities and/or retinal hemorrhages and/or exudates and/or optic nerve head swelling
- 8. Retinitis pigmentosa:** defined as mid-peripheral 'bone spicule' retinal pigmentation, waxy pallor of the optic disc, arteriolar attenuation.<sup>[6]</sup>
- 9. Macular hole:** defined as yellow spot or a yellow circle in the fovea. (Gass classification stage 2 or above)
- 10. Macular Epiretinal Membranes:** defined as glistening light reflex, retinal striae or/and tortuous, straightened, obscured vessels.<sup>[7]</sup>

**11. Myelinated retinal nerve fiber layer:** defined as distinct peripapillary white striated patch with feathered borders approximately one disc diameter in size or larger.

Reference

[1] Grading Diabetic Retinopathy from Stereoscopic Color Fundus Photographs—An Extension of the Modified Airlie House Classification:eTDRS Report Number 10 [J]. *Ophthalmology*, 1991, 98(5, Supplement): 786-806.

[2] Ferris F L, III, Wilkinson C P, Bird A,eT al. Clinical Classification of Age-related Macular Degeneration [J]. *Ophthalmology*, 2013, 120(4): 844-851.

[3] Ting D S W, Cheung C Y-L, Lim G,eT al. Development and Validation of a Deep Learning System for Diabetic Retinopathy and Related Eye Diseases Using Retinal Images From Multiethnic Populations With Diabetes [J]. *JAMA*, 2017, 318(22): 2211-2223.

[4] Ohno-Matsui K, Kawasaki R, Jonas J B,eT al. International Photographic Classification and Grading System for Myopic Maculopathy [J]. *Am J Ophthalmol*, 2015, 159(5): 877-883.e877.

[5] Wong T Y, Scott I U. Retinal-Vein Occlusion [J]. *New England Journal of Medicine*, 2010, 363(22): 2135-2144.

[6] Hartong D T, Berson E L, Dryja T P. Retinitis pigmentosa [J]. *The Lancet*, 2006, 368(9549): 1795-1809.

[7] Bu S-C, Kuijer R, Li X-R,eT al. IDIOPATHIC EPIRETINAL MEMBRANE [J]. *Retina*, 2014, 34(12):

[8] Biousse V, Newman N J, Najjar R P,eT al. Optic Disc Classification by Deep Learning versus Expert Neuro-Ophthalmologists [J]. *Annals of Neurology*, 2020, 88(4): 785-795.

**(c) List of the location of health screening centers and the fundus cameras used in each center.**

| Subregions | Province | Camera Model | iKang Corporation public health screening centers (City)                             |
|------------|----------|--------------|--------------------------------------------------------------------------------------|
| East China | Shanghai | TRC-NW200    | Shanghai Yuanhua Medical Centre of iKang Guobin Healthcare Group (Shanghai, China)   |
| East China | Shanghai | CR-2 AF      | Shanghai Jun'an Medical Centre of iKang Healthcare Group (Shanghai, China)           |
| East China | Shanghai | CR-2 AF      | Shanghai Wangzu Medical Centre of iKang Guobin Healthcare Group (Shanghai, China)    |
| East China | Shanghai | CR-2 AF      | Shanghai Zhiwei Medical Centre of iKang Guobin Healthcare Group (Shanghai, China)    |
| East China | Shanghai | CR-2 AF      | Shanghai Yipin Medical Centre of iKang Guobin Healthcare Group (Shanghai, China)     |
| East China | Shanghai | CR-2 AF      | Shanghai Fukang Medical Centre of iKang Guobin Healthcare Group (Shanghai, China)    |
| East China | Shanghai | CR-2 AF      | Shanghai Binming Medical Centre of iKang Guobin Healthcare Group (Shanghai, China)   |
| East China | Shanghai | CR-2 AF      | Shanghai Waizhitan Medical Centre of iKang Guobin Healthcare Group (Shanghai, China) |
| East China | Shanghai | CR-2 AF      | Shanghai Renren Medical Centre of iKang Guobin Healthcare Group (Shanghai, China)    |

|                   |                 |                     |                                                                                      |
|-------------------|-----------------|---------------------|--------------------------------------------------------------------------------------|
| East China        | Anhui           | CR-2 AF             | Hefei Medical Centre of iKang Healthcare Group (Hefei, China)                        |
| East China        | Anhui           | CR-2 AF             | Wuhu Medical Centre of iKang Guobin Healthcare Group (Wuhu, China)                   |
| East China        | Jiangsu         | CR-2 AF             | Nanjing Junan Medical Centre of iKang Guobin Healthcare Group (Nanjing, China)       |
| East China        | Jiangsu         | CR-2 AF             | Nanjing Xinjie Medical Centre of iKang Guobin Healthcare Group (Nanjing, China)      |
| East China        | Jiangsu         | CR-2 AF             | Wuxi Medical Centre of iKang Healthcare Group (Wuxi, China)                          |
| East China        | Jiangsu         | CR-2 AF             | Hangzhou Wenhui Medical Centre of iKang Healthcare Group (Hangzhou, China)           |
| East China        | Jiangsu         | CR-2 AF             | Hangzhou Zhuoyue Medical Centre of iKang Healthcare Group (Hangzhou, China)          |
| East China        | Jiangsu         | CR-2 AF             | Hangzhou Junan Medical Centre of iKang Guobin Healthcare Group (Hangzhou, China)     |
| East China        | Jiangsu         | CR-2 AF             | Suzhou Medical Centre of iKang Guobin Healthcare Group (Suzhou, China)               |
| East China        | Jiangsu         | CR-2 AF             | Suzhou Zhuoyue Medical Centre of iKang Healthcare Group (Suzhou, China)              |
| East China        | Jiangsu         | CR-2 AF             | Zhenjiang Wenguang Medical Centre of iKang Healthcare Group (Zhenjiang, China)       |
| East China        | Jiangsu         | CR-2 AF             | Jiangyin Lingang Medical Centre of iKang Healthcare Group (Jiangyin, China)          |
| East China        | Zhejiang        | CR-2 AF             | Ningbo Haishu Medical Centre of iKang Guobin Healthcare Group (Ningbo, China)        |
| East China        | Hubei           | CR-2 AF             | Yichang Zhuoyue Medical Centre of iKang Healthcare Group (Yichang, China)            |
| East China        | Hubei           | CR-2 AF             | Wuhan Jindun Medical Centre of iKang Guobin Healthcare Group (Wuhan, China)          |
| East China        | Hubei           | CR-2 AF             | Wuhan Zhuoyue Medical Centre of iKang Healthcare Group (Wuhan, China)                |
| <b>Subregions</b> | <b>Province</b> | <b>Camera Model</b> | <b>iKang Corporation public health screening centers (City)</b>                      |
| North China       | Jilin           | CR-2 AF             | Changchun Jianshe Medical Centre of iKang Guobin Healthcare Group (Changchun, China) |
| North China       | Tianjin         | CR-2 AF             | Tianjin Fenghui Medical Centre of iKang Guobin Healthcare Group (Tianjin, China)     |
| North China       | Tianjin         | CR-2 AF             | Tianjin Dongrun Medical Centre of iKang Guobin Healthcare Group (Tianjin, China)     |
| North China       | Tianjin         | CR-2 AF             | Tianjin Heping Medical Centre of iKang Healthcare Group (Tianjin, China)             |
| North China       | Tianjin         | CR-2 AF             | Tianjin Hexi Medical Centre of iKang Guobin Healthcare Group (Tianjin, China)        |
| North China       | Tianjin         | CR-2 AF             | Tianjin Yuecheng Medical Centre of iKang Guobin Healthcare Group (Tianjin, China)    |
| North China       | Shandong        | CR-2 AF             | Weihai Ciming Medical Centre of iKang Guobin Healthcare Group (Weihai, China)        |
| North China       | Shandong        | CR-2 AF             | Jinan Zhuoyue Medical Centre of iKang Healthcare Group (Jinan, China)                |
| North China       | Shandong        | CR-2 AF             | Weifang Ciming Medical Centre of iKang Guobin Healthcare Group (Weifang, China)      |
| North China       | Shandong        | CR-2 AF             | Yantai Medical Centre of iKang Healthcare Group (Yantai, China)                      |
| North China       | Shandong        | CR-2 AF             | Qingdao Zhuoyue Medical Centre of iKang Healthcare Group (Qingdao, China)            |
| North China       | Liaoning        | TRC-NW300           | Shenyang Jinai Medical Centre of iKang Guobin Healthcare Group (Shenyang, China)     |

|                   |                 |                       |                                                                                     |
|-------------------|-----------------|-----------------------|-------------------------------------------------------------------------------------|
| North China       | Liaoning        | CR-2 AF               | Shenyang Shenhe Medical Centre of iKang Guobin Healthcare Group (Shenyang, China)   |
| North China       | Beijing         | CR-2 AF               | Beijing Tongren hospital (Beijing, China)                                           |
| North China       | Beijing         | CR-2 AF               | Beijing Friendship Hospital (Beijing, China)                                        |
| North China       | Shanxi          | Nonmyd $\alpha$ -DIII | Xi'an Qujiang Medical Centre of iKang Guobin Healthcare Group (Xi'an, China)        |
| North China       | Shanxi          | Nonmyd $\alpha$ -DIII | Xi'an Weiyang Medical Centre of iKang Guobin Healthcare Group (Xi'an, China)        |
| North China       | Shanxi          | Nonmyd $\alpha$ -DIII | Xi'an Lianhu Medical Centre of iKang Healthcare Group (Xi'an, China)                |
| South China       | Guangdong       | CR-2 AF               | Dongguan Songshan Medical Centre of iKang Healthcare Group (Dongguan, China)        |
| South China       | Guangdong       | CR-2 AF               | Dongguan Caifu Medical Centre of iKang Guobin Healthcare Group (Dongguan, China)    |
| South China       | Guangdong       | CR-2 AF               | Foshan Medical Centre of iKang Healthcare Group (Foshan, China)                     |
| South China       | Guangdong       | CR-2 AF               | Guangzhou Medical Centre of iKang Guobin Healthcare Group (Guangzhou, China)        |
| South China       | Guangdong       | CR-2 AF               | Guangzhou Junan Medical Centre of iKang Healthcare Group (Guangzhou, China)         |
| South China       | Guangdong       | CR-2 AF               | Guangzhou Nantian Medical Centre of iKang Healthcare Group (Guangzhou, China)       |
| South China       | Guangdong       | CR-2 AF               | Guangzhou Tianhe Medical Centre of iKang Healthcare Group (Guangzhou, China)        |
| South China       | Shenzhen        | NT-2000               | Shenzhen Zhuoyue Medical Centre of iKang Healthcare Group (Shenzhen, China)         |
| South China       | Shenzhen        | CR-2 AF               | Shenzhen Xinglin Medical Centre of iKang Guobin Healthcare Group (Shenzhen, China)  |
| South China       | Hunan           | CR-2 AF               | Changsha shuangta Medical Centre of iKang Healthcare Group (Changsha, China)        |
| <b>Subregions</b> | <b>Province</b> | <b>Camera Model</b>   | <b>iKang Corporation public health screening centers (City)</b>                     |
| South China       | Fujian          | CR-2 AF               | Fuzhou Gulou Medical Centre of iKang Guobin Healthcare Group (Fuzhou, China)        |
| West China        | Chongqing       | CR-2 AF               | Chongqing Zhuoyue Medical Centre of iKang Healthcare Group (Chongqing, China)       |
| West China        | Sichuan         | CR-2 AF               | Chengdu Anshengmei Medical Centre of iKang Guobin Healthcare Group (Chengdu, China) |
| West China        | Sichuan         | CR-2 AF               | Chengdu Luomashi Medical Centre of iKang Guobin Healthcare Group (Chengdu, China)   |
| West China        | Sichuan         | CR-2 AF               | Chengdu Hongzhaobi Medical Centre of iKang Guobin Healthcare Group (Chengdu, China) |
| West China        | Sichuan         | CR-2 AF               | Mianyang Medical Centre of iKang Guobin Healthcare Group (Mianyang, China)          |
| West China        | Ningxia         | CR-2 AF               | Guyuan Medical Centre of iKang Guobin Healthcare Group (Guyuan, China)              |
| West China        | Ningxia         | CR-2 AF               | Yinchuan Medical Centre of iKang Guobin Healthcare Group (Yinchuan, China)          |
| West China        | Guizhou         | CR-2 AF               | Liupanshui Medical Centre of iKang Guobin Healthcare Group (Liupanshui, China)      |
| West China        | Guizhou         | CR-2 AF               | Kaili Medical Centre of iKang Guobin Healthcare Group (Kaili, China)                |
| West China        | Guizhou         | CR-2 AF               | Bijie Medical Centre of iKang Guobin Healthcare Group (Bijie, China)                |
| West China        | Guizhou         | CR-2 AF               | Guizhou Zhuoyue Medical Centre of iKang Guobin Healthcare Group (Guiyang, China)    |

**(d) Detailed information of the 45-expert panel in prospective validation dataset**

| Reads per year | Years of experience |       |       |
|----------------|---------------------|-------|-------|
|                | 5-9                 | 10-14 | 15-19 |
| 10000-30000    | 3                   | 1     | 4     |
| 30000-50000    | 5                   | 4     | 1     |
| 50000-70000    | 12                  | 4     | 0     |
| >70000         | 9                   | 2     | 0     |

**(e) Detailed information of the 6-expert panel in retrospective test dataset – Reader Study**

| Years of experience |     |
|---------------------|-----|
| 15-19               | ≥20 |
| 4                   | 2   |

**eFigure 1.** The Overall Structure of Study

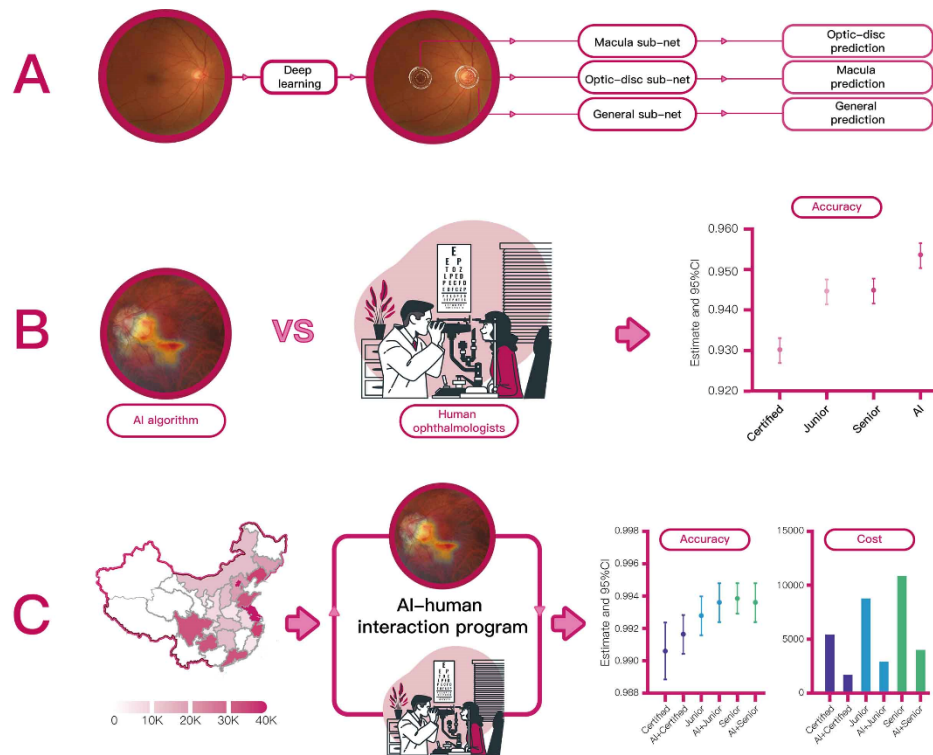

A. The structure of the proposed multi-task classification method; B. Schematic diagram of the prospective study; C. Schematic diagram of the reader study.



**eFigure 2.** Distribution of Images in Prospective Validation Dataset

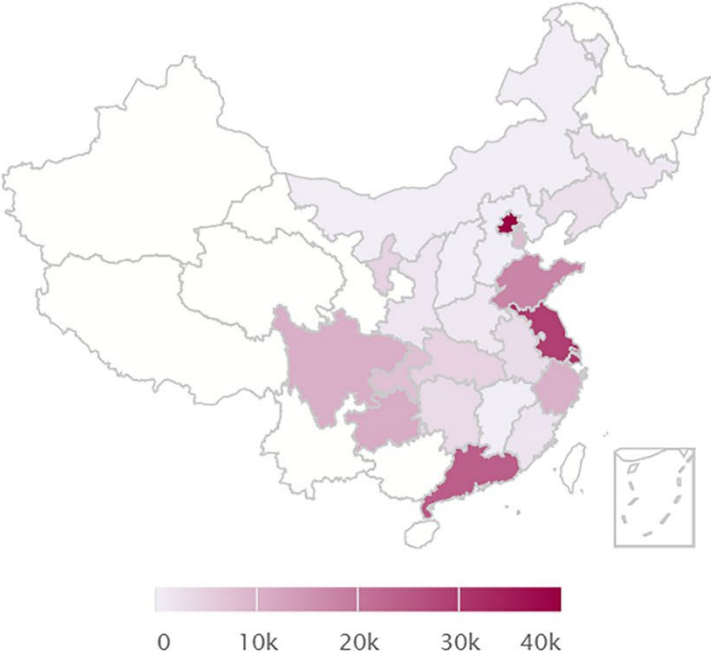

**eFigure 3.** Performance of the RAIDS in Prospective Validation Dataset

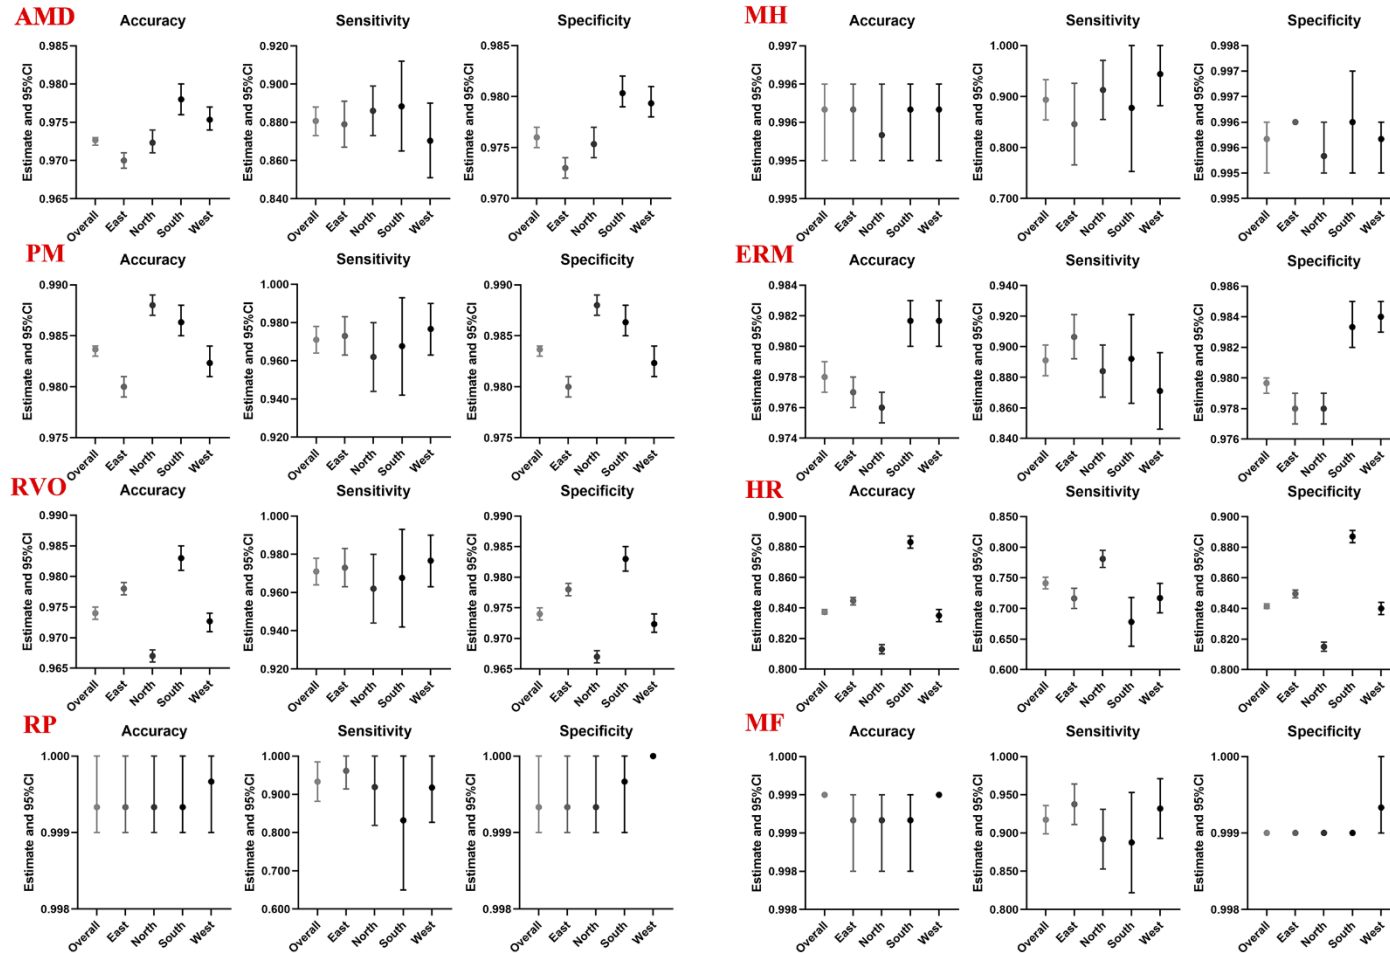

AMD, age-related macular degeneration; PM, pathologic myopia; ERM, epiretinal macular membrane; HR, hypertensive retinopathy; RVO, retinal vein occlusion; MH, macula hole; MF, myelinated fibers; RP, retinitis pigmentosa.

**eFigure 4.** Heatmap Visualization of Referral Diabetic Retinopathy

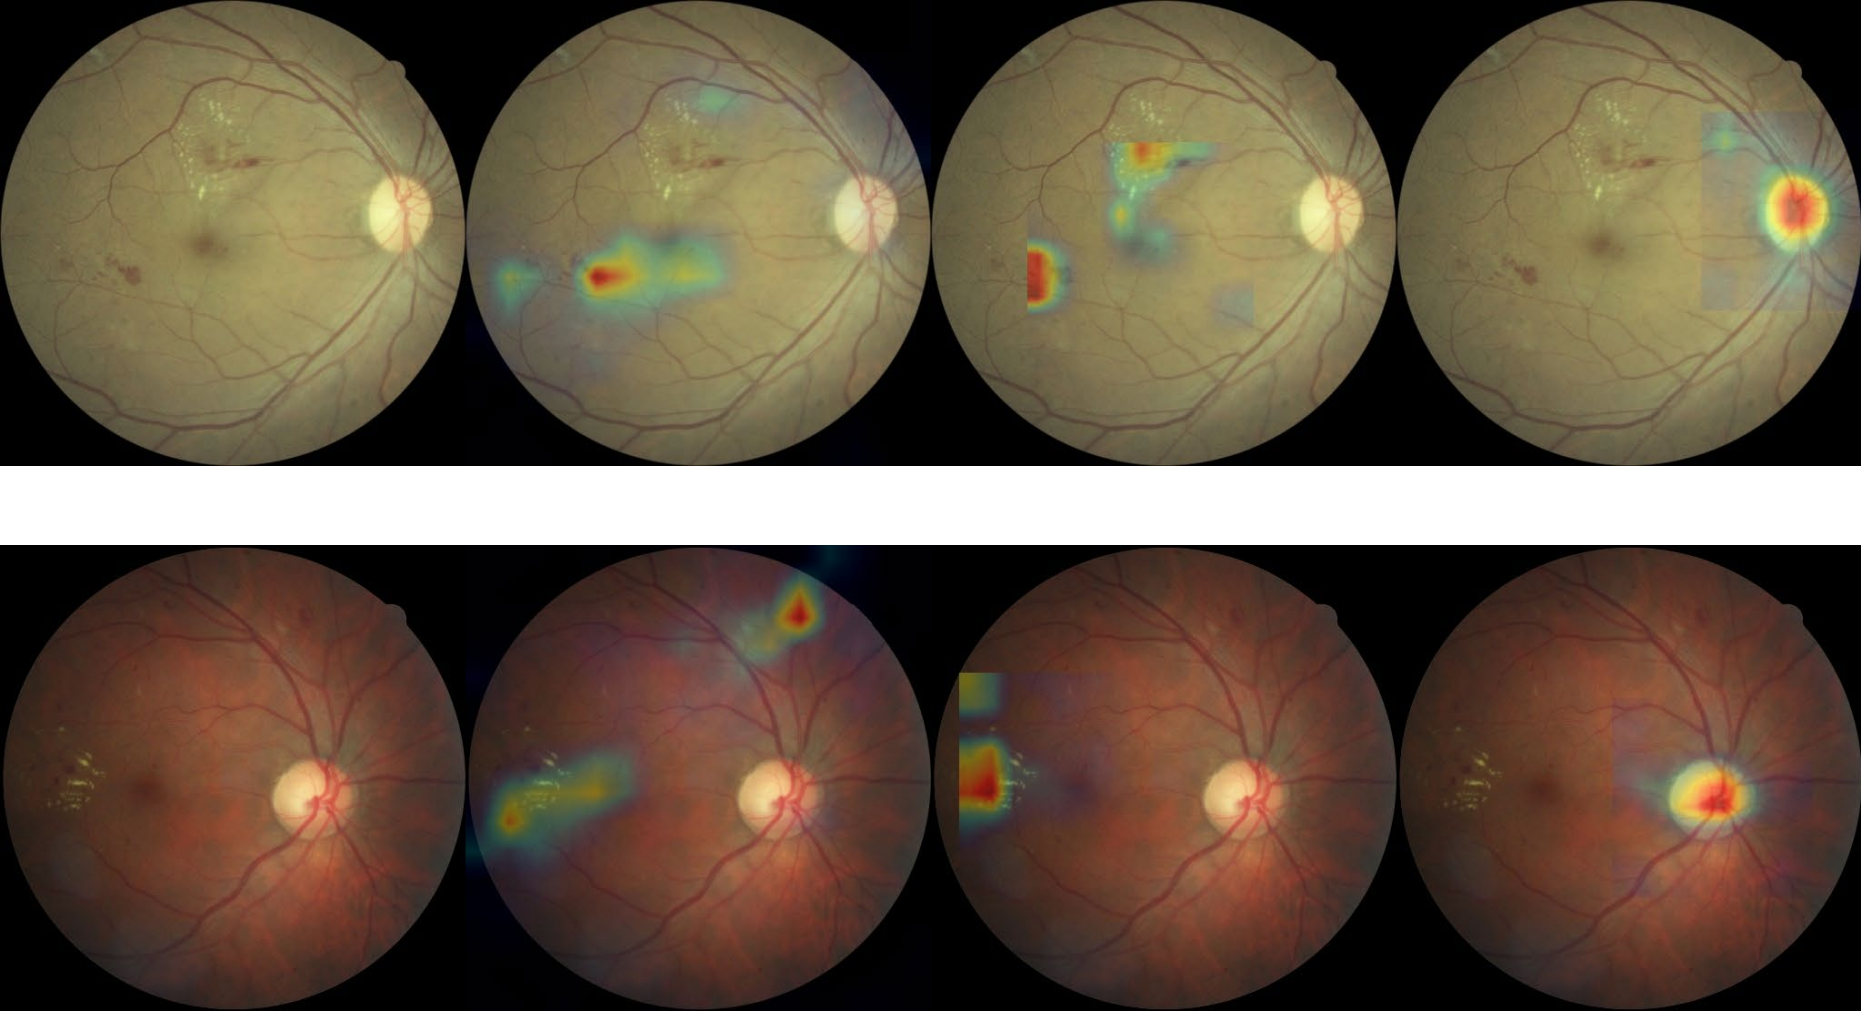

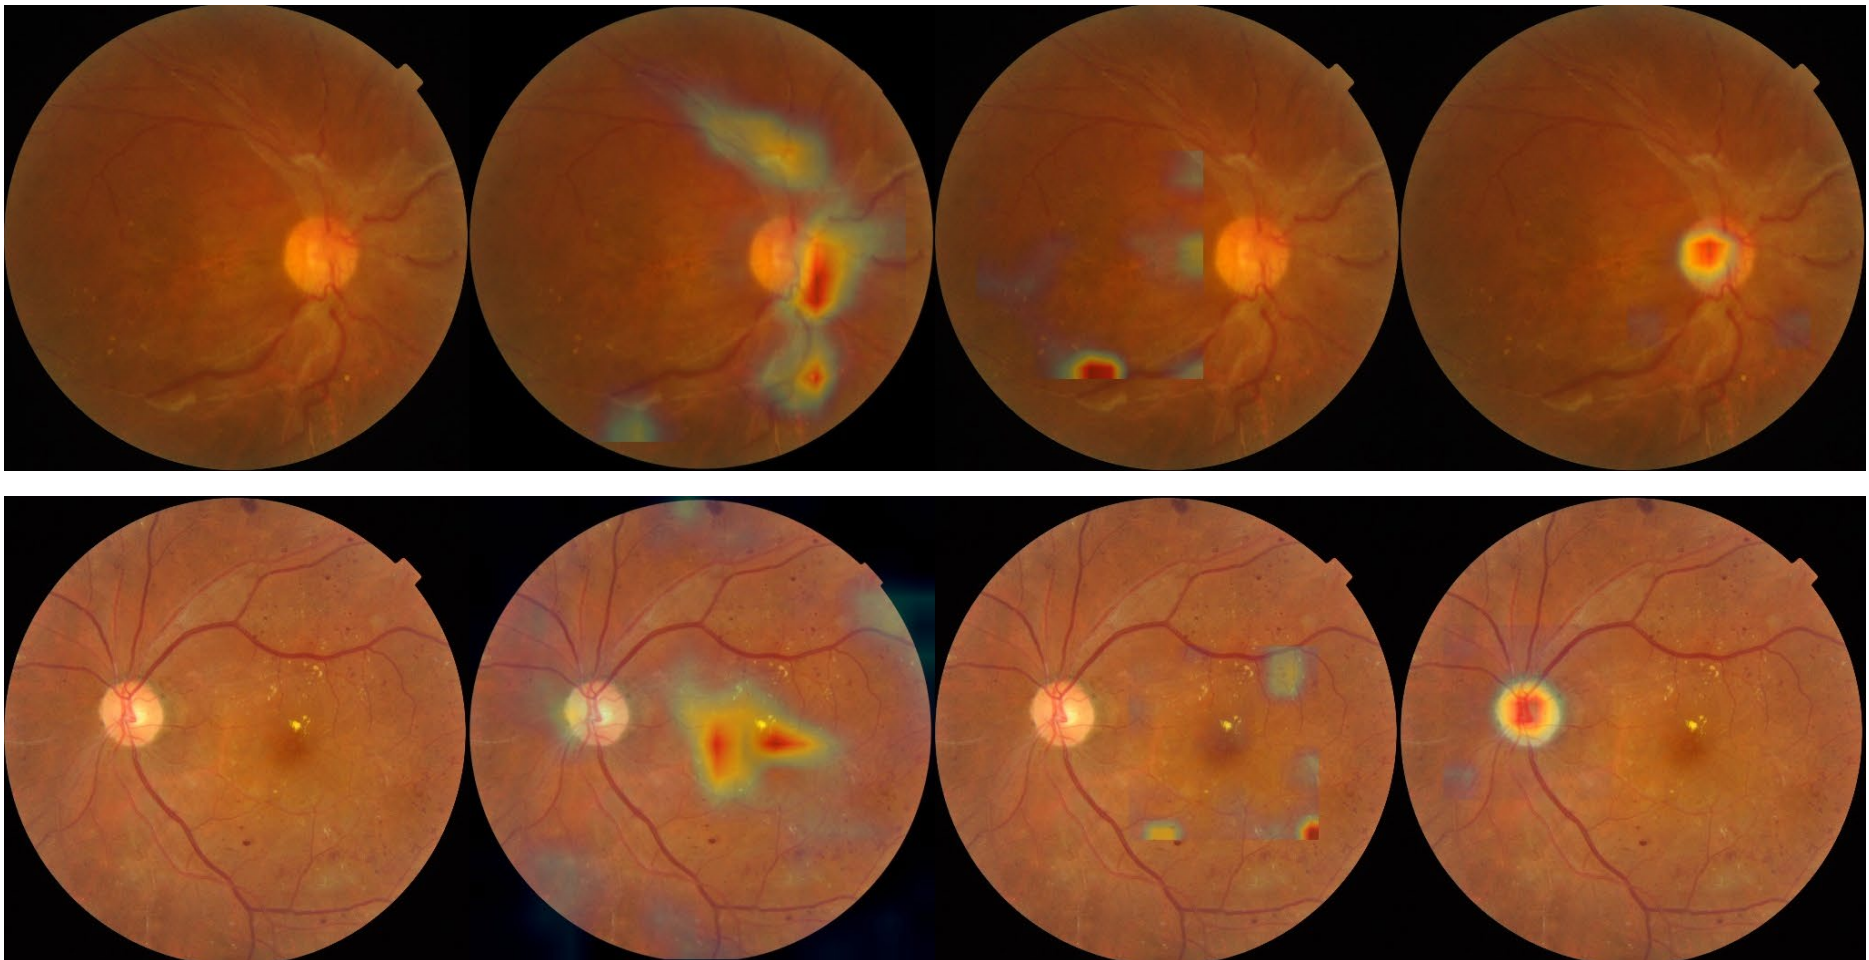

Heatmap demonstrating representative lesions, shown in original fundus image (first column), general heatmap (second column), macula heatmap (third column), and optic-disc heatmap (last column)



**eFigure 5.** Heatmap Visualization of Referral Age-Related Macular Degeneration

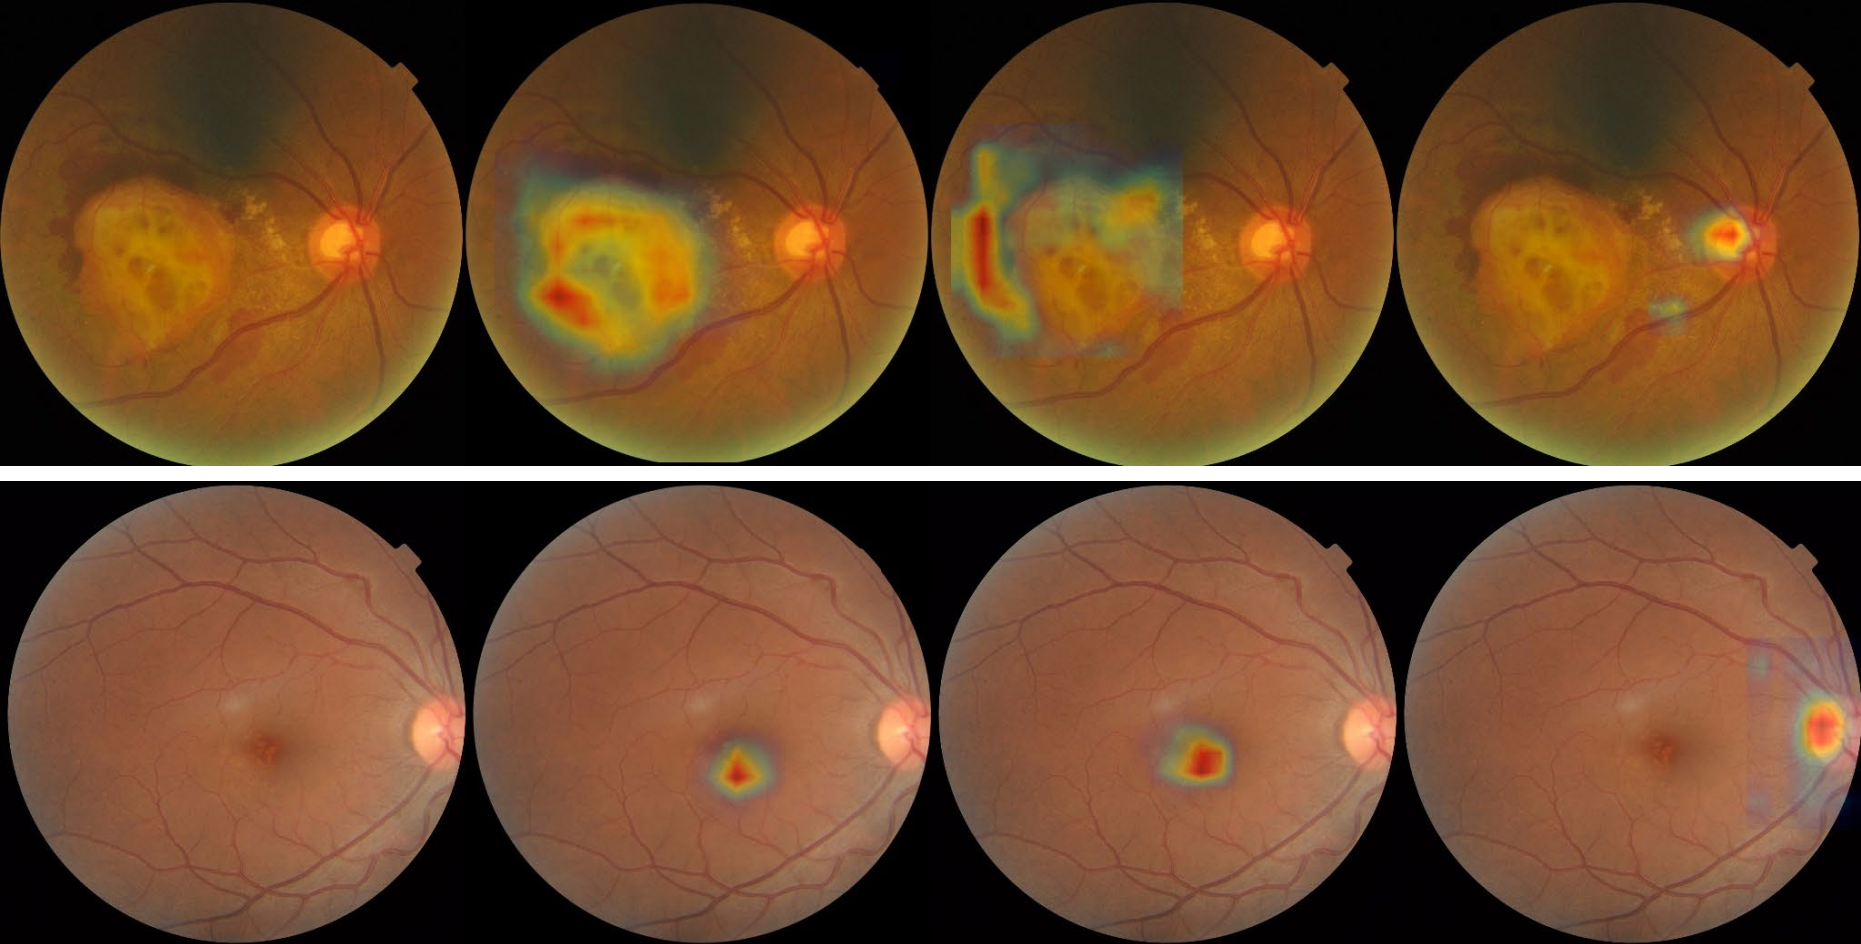

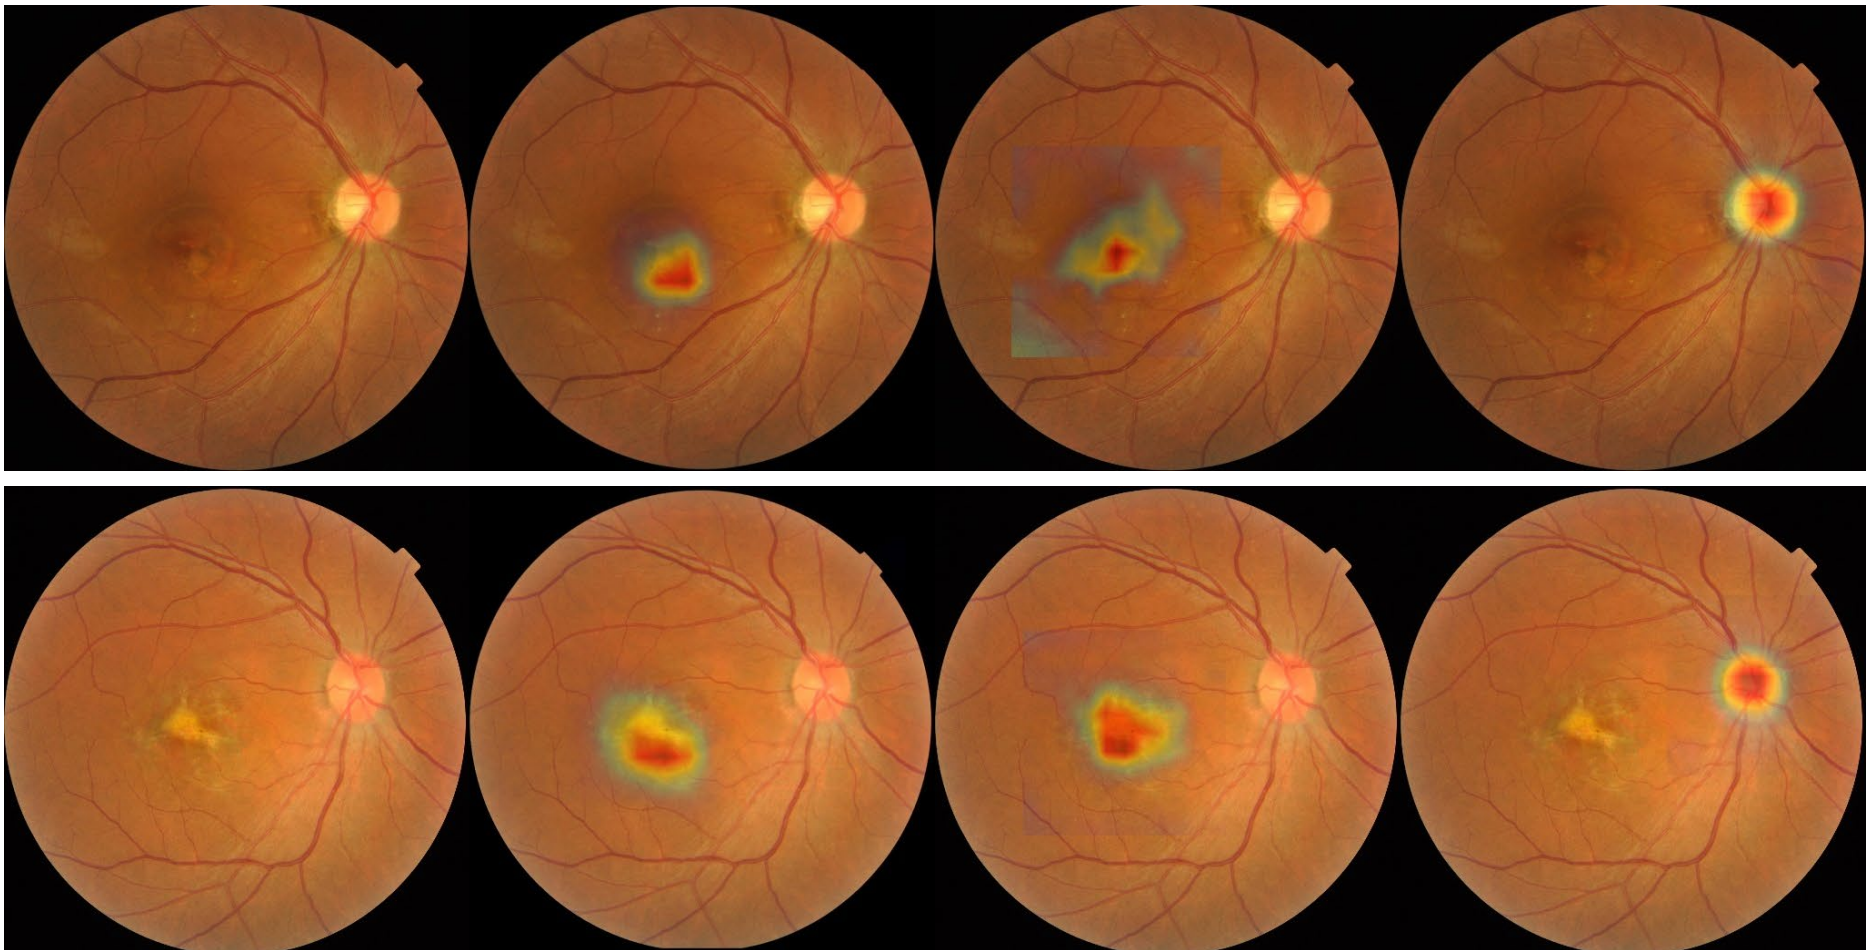

Heatmap demonstrating representative lesions, shown in original fundus image (first column), general heatmap (second column), macula heatmap (third column), and optic-disc heatmap (last column)

**eFigure 6.** Heatmap Visualization of Referral Possible Glaucoma

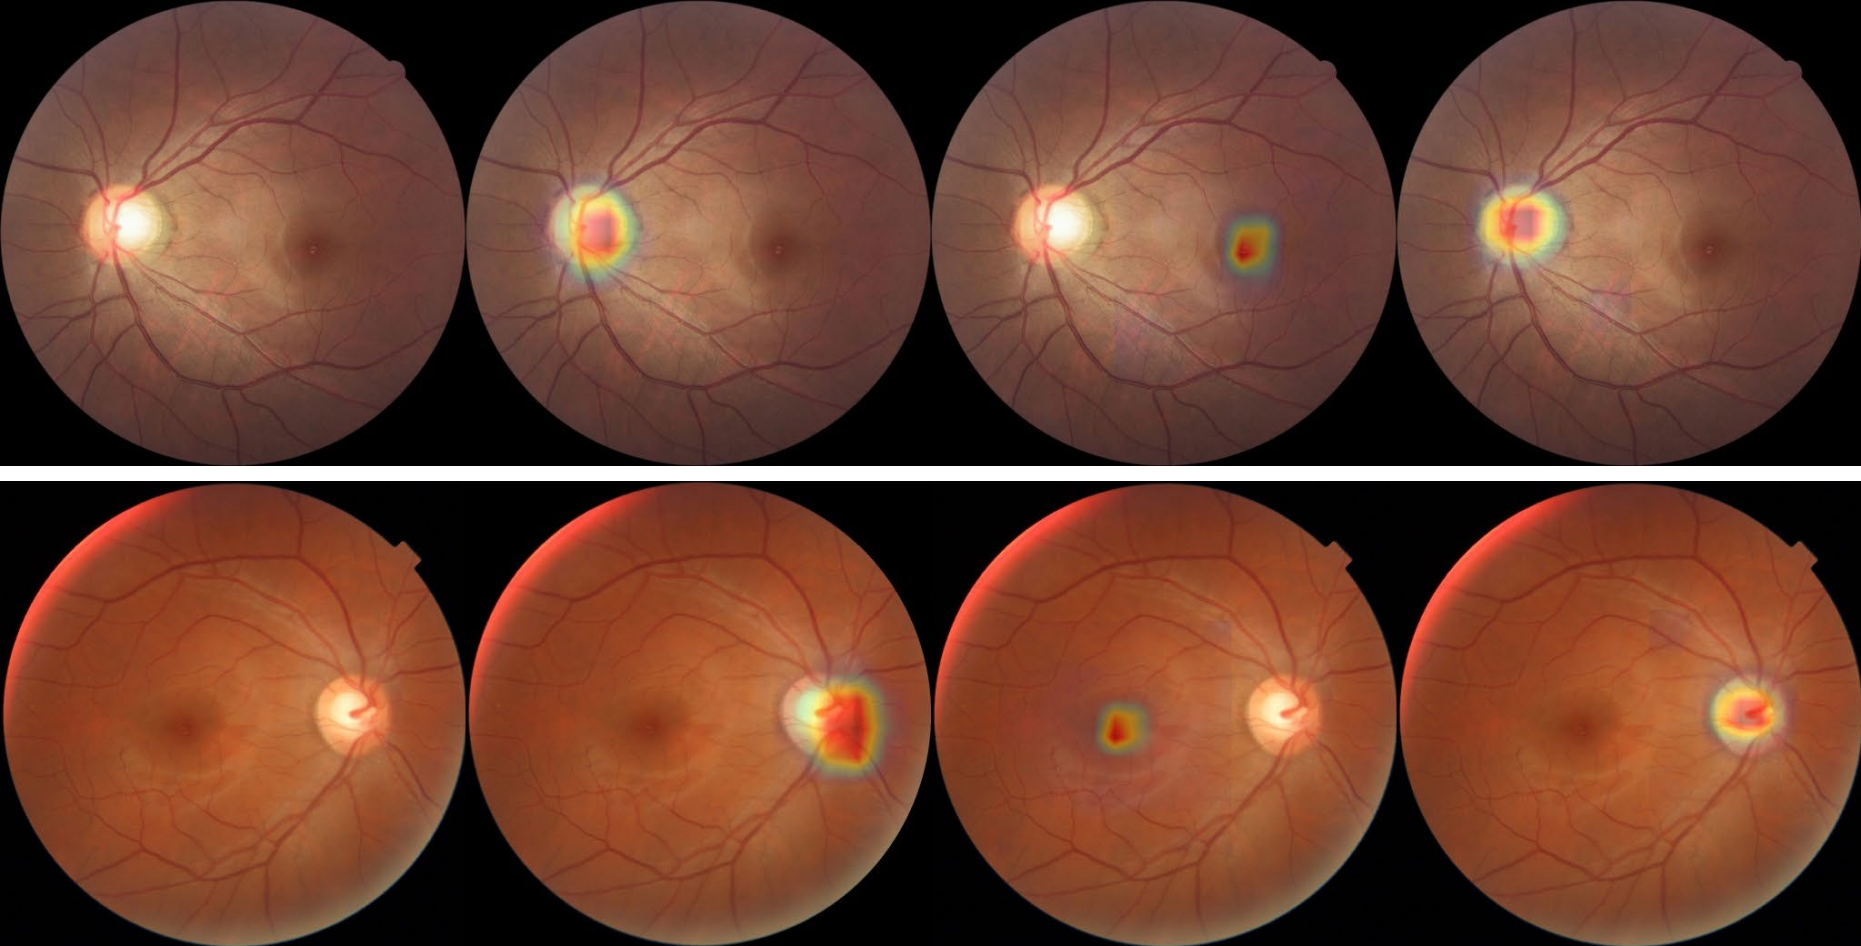



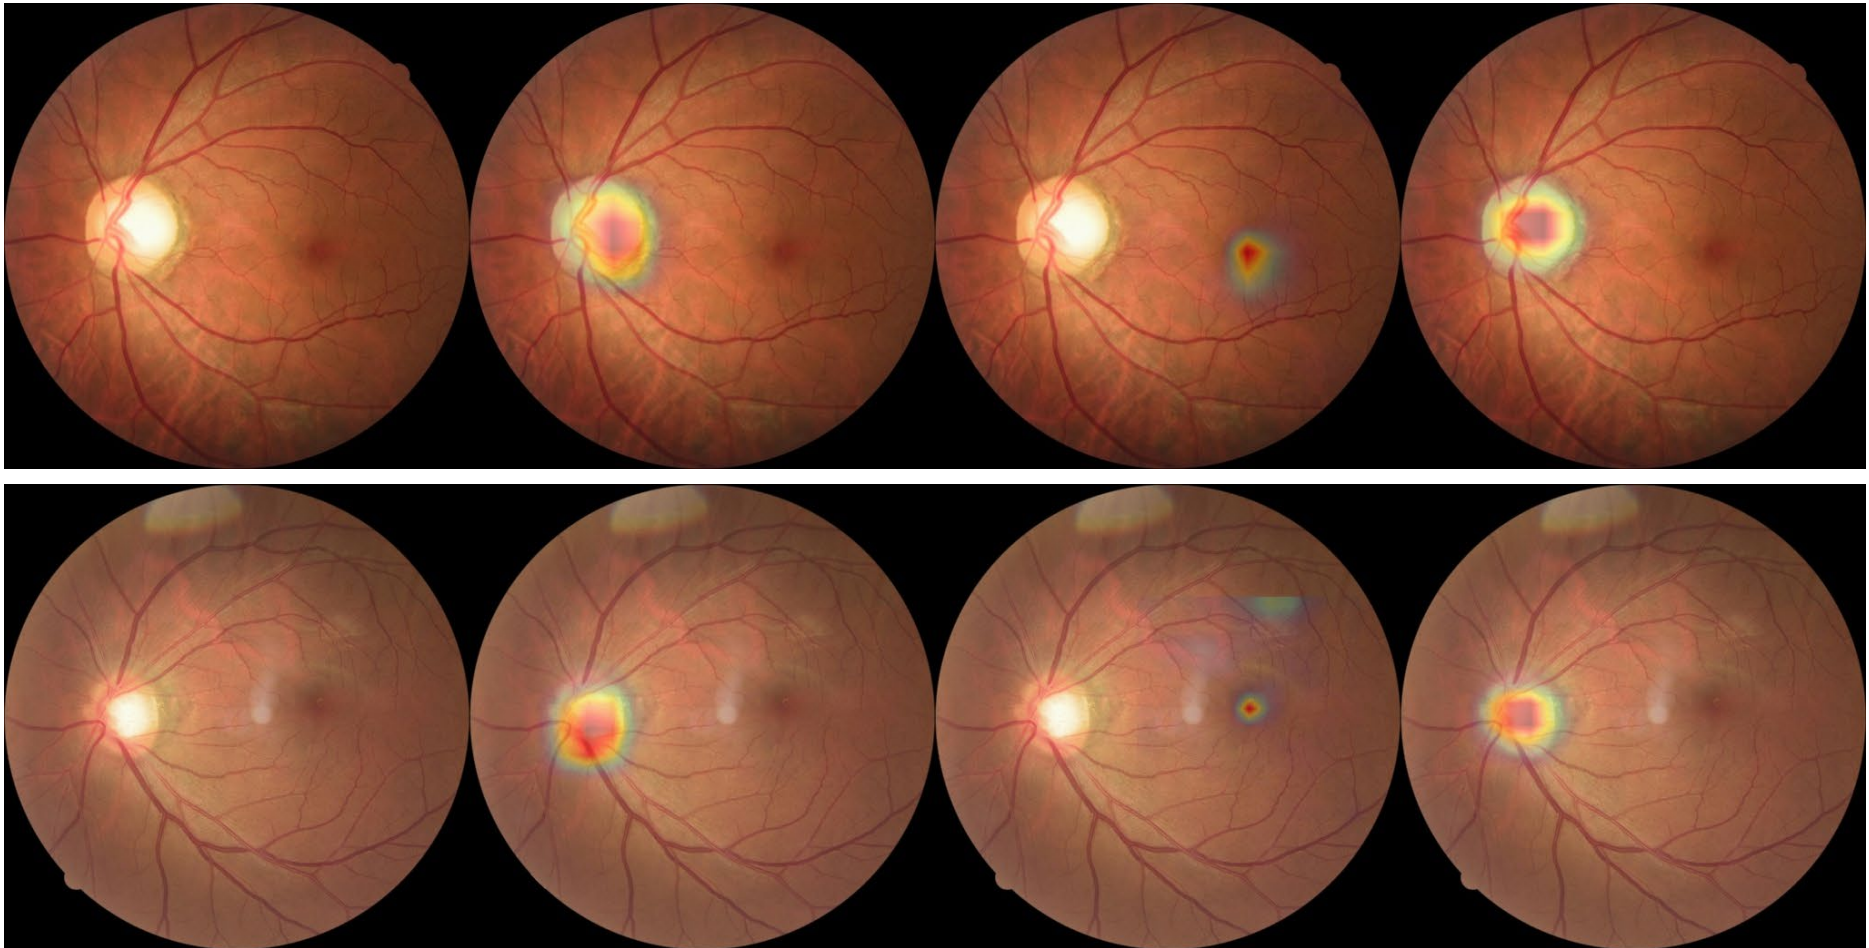

Heatmap demonstrating representative lesions, shown in original fundus image (first column), general heatmap (second column), macula heatmap (third column), and optic-disc heatmap (last column)



**eFigure 7.** Heatmap Visualization of Pathological Myopia

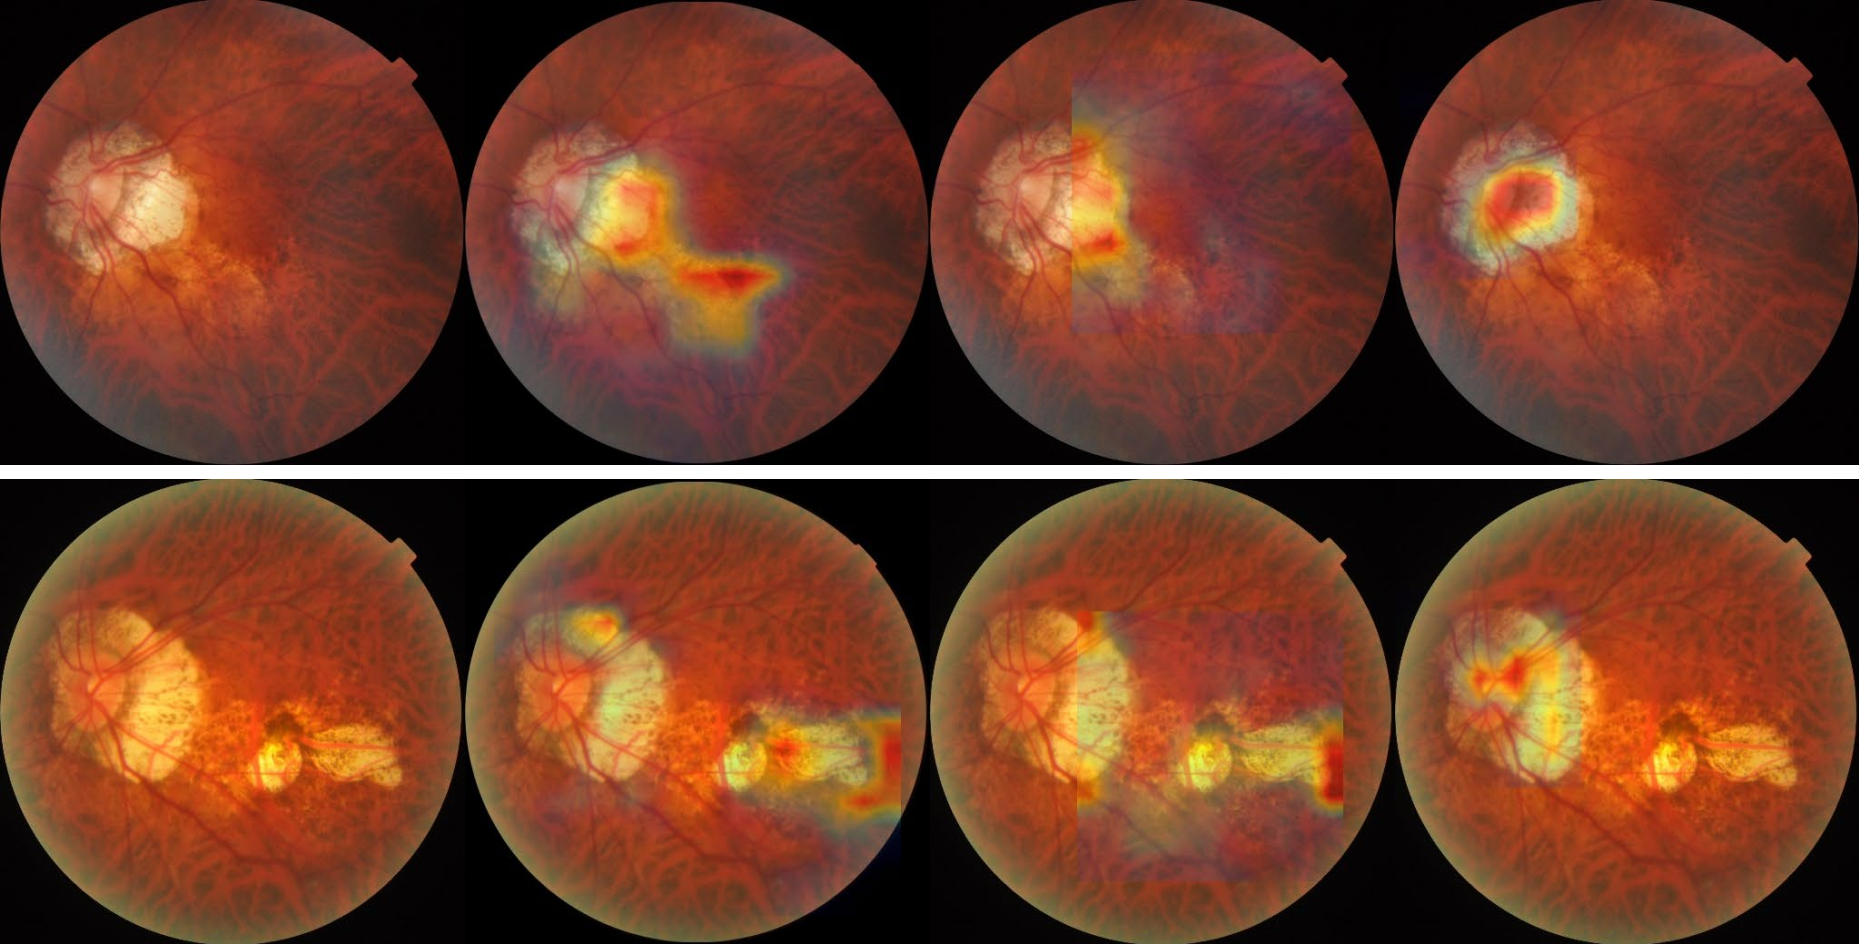

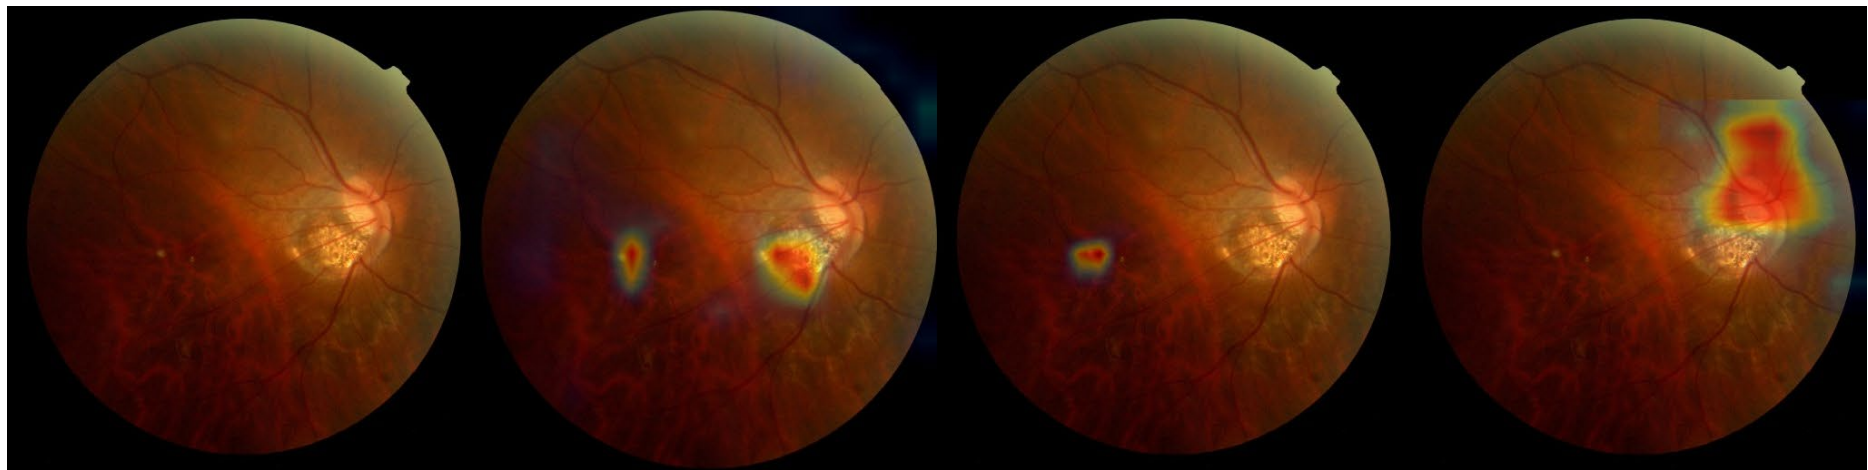

Heatmap demonstrating representative lesions, shown in original fundus image (first column), general heatmap (second column), macula heatmap (third column), and optic-disc heatmap (last column)

**eFigure 8.** Heatmap Visualization of Retinal Vein Occlusion

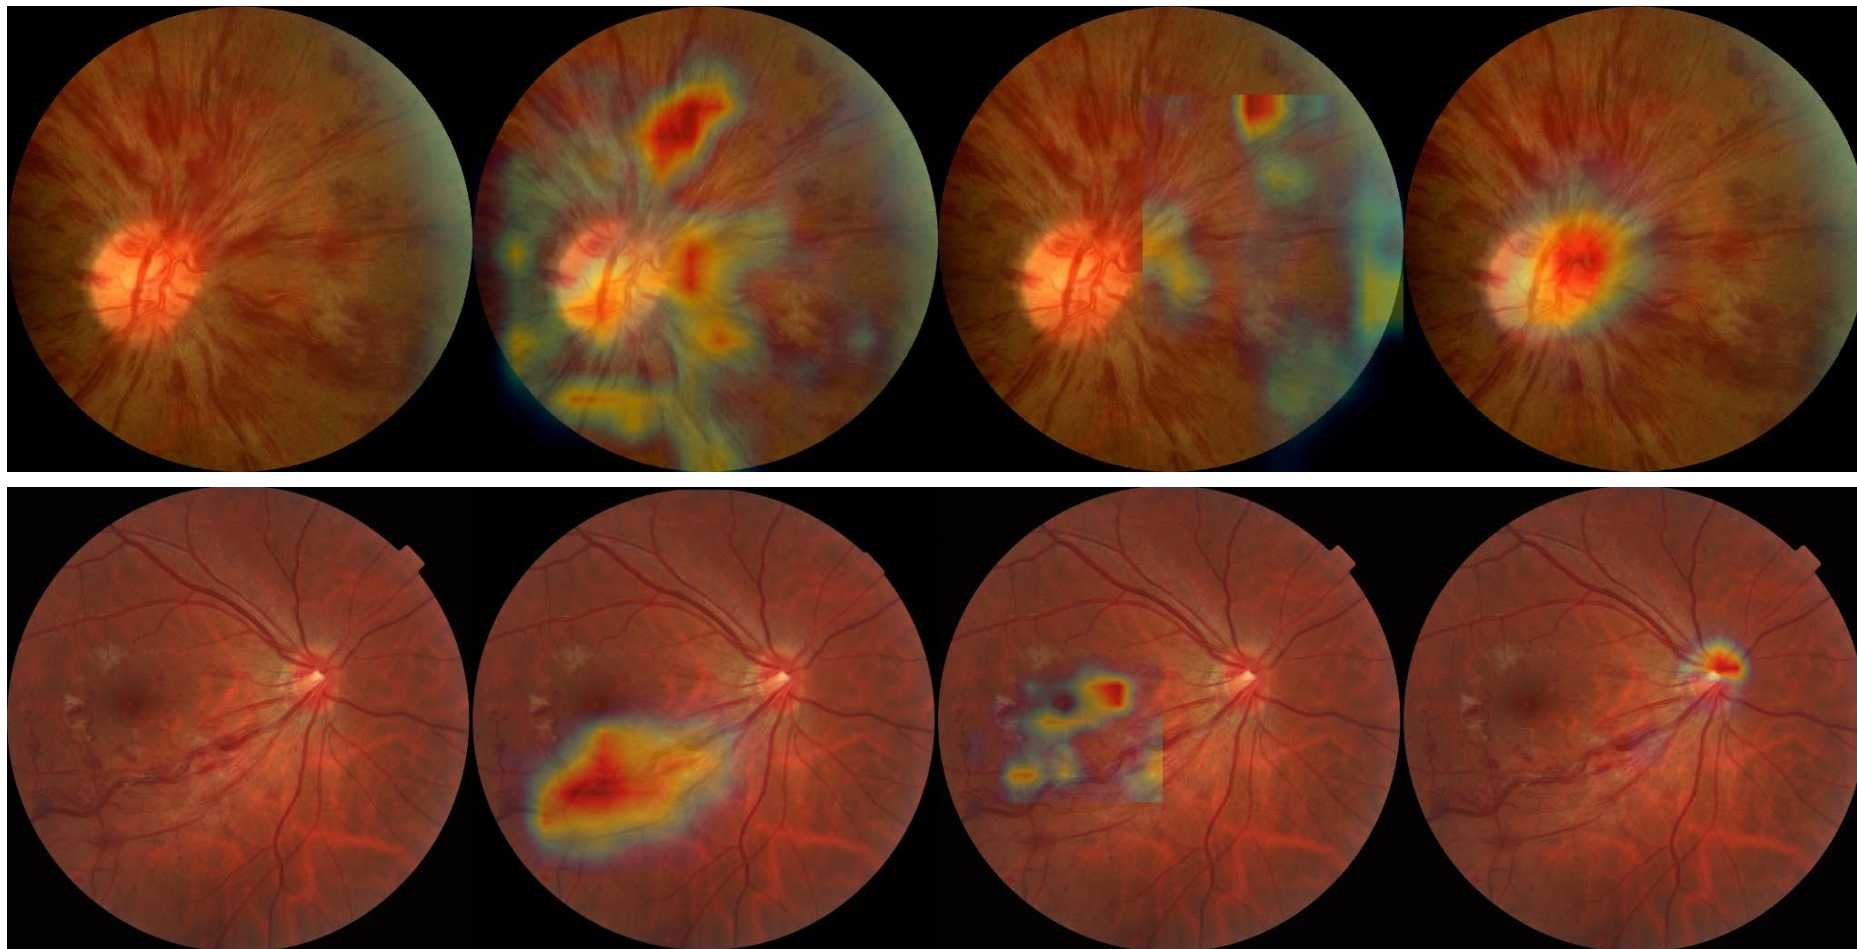

Heatmap demonstrating representative lesions, shown in original fundus image (first column), general heatmap (second column), macula heatmap (third column), and optic-disc heatmap (last column)



**eFigure 9.** Heatmap Visualization of Macula Hole

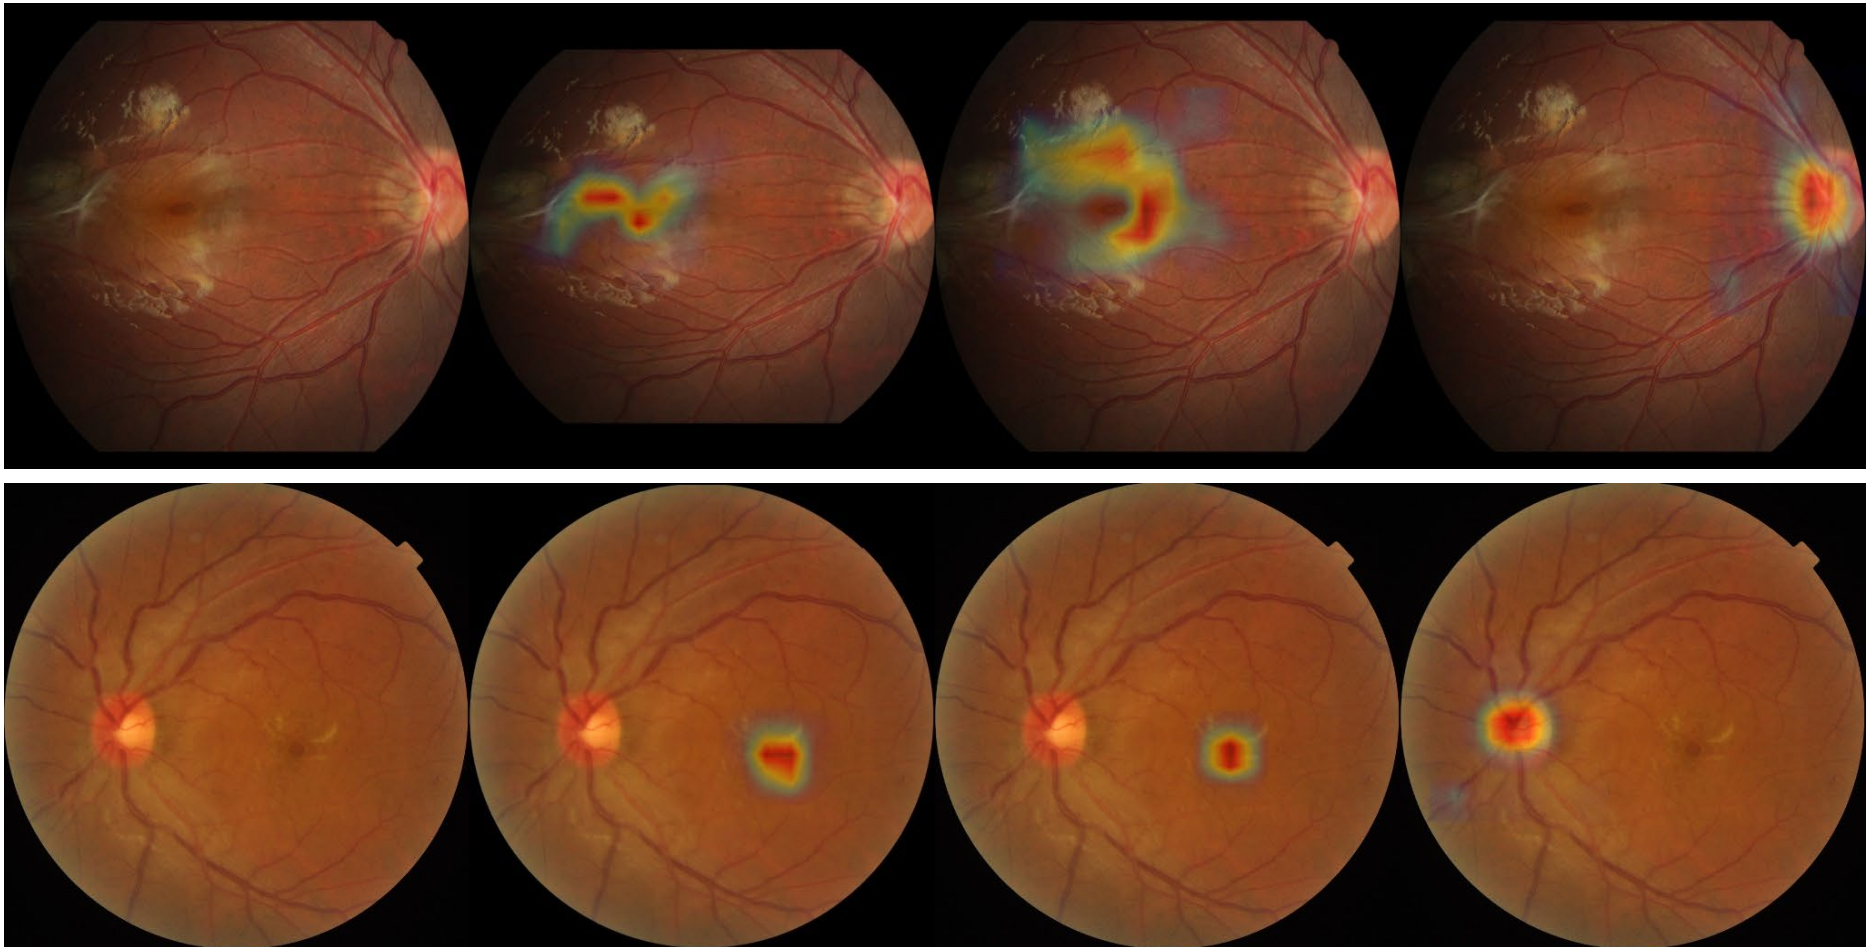

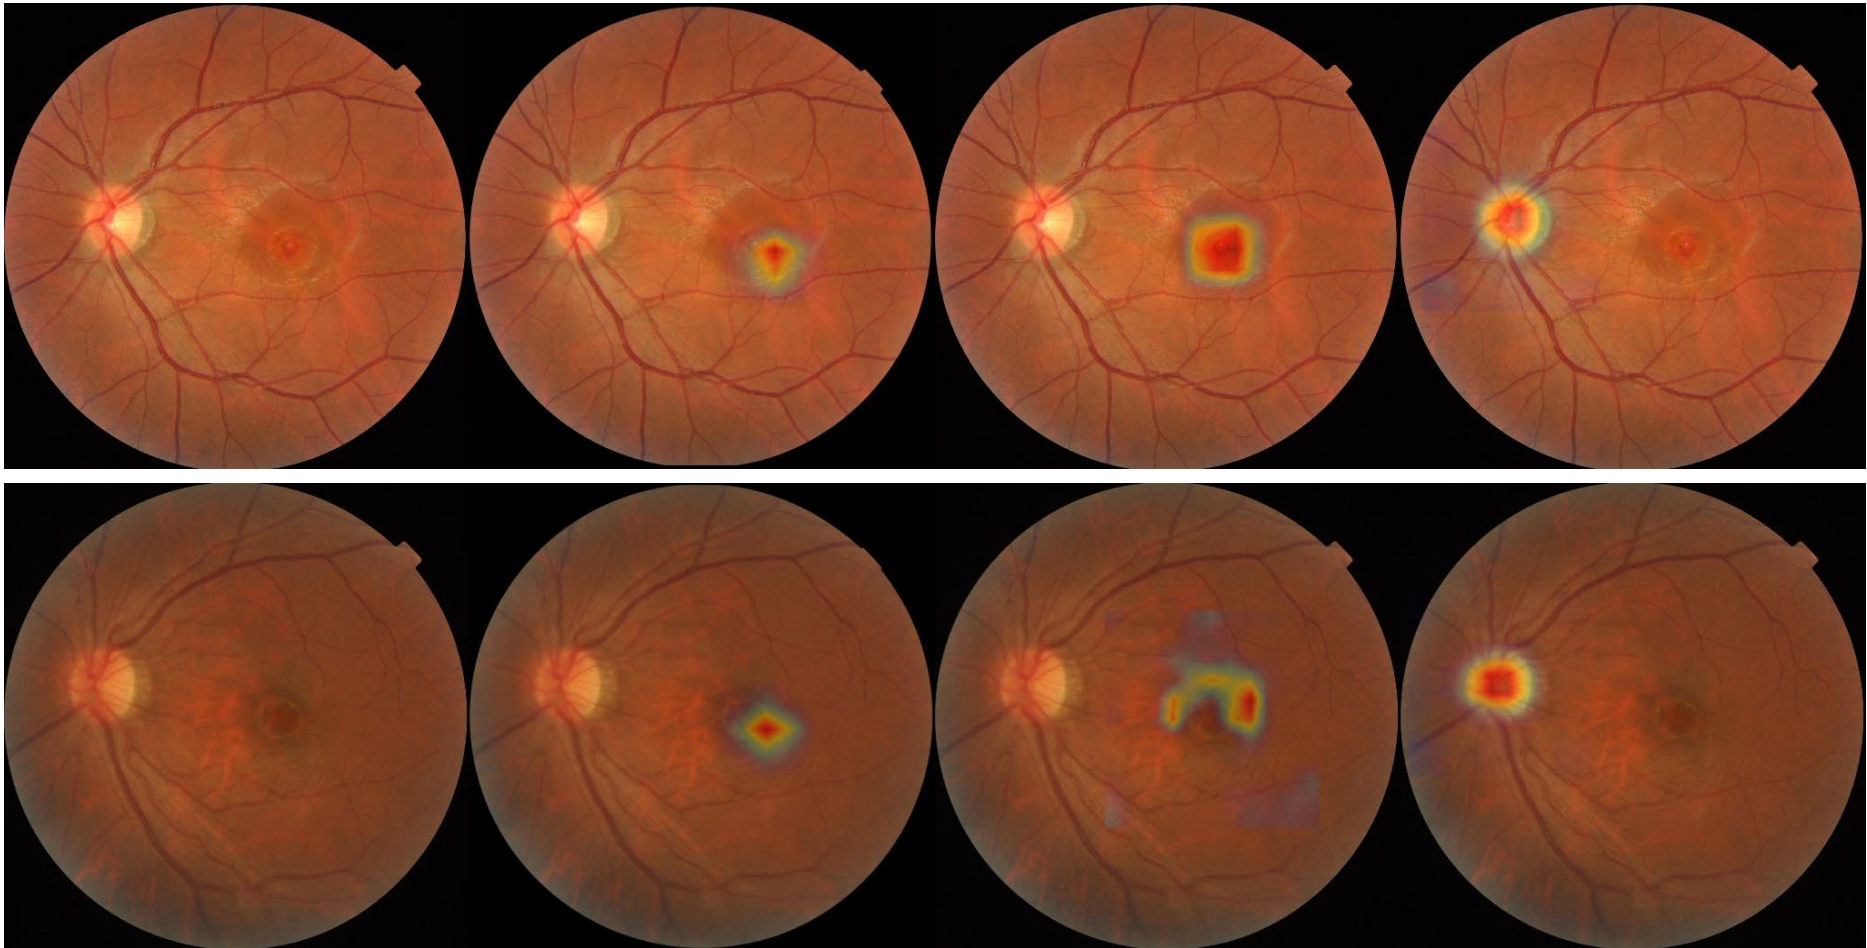

Heatmap demonstrating representative lesions, shown in original fundus image (first column), general heatmap (second column), macula heatmap (third column), and optic-disc heatmap (last column)

**eFigure 10.** Heatmap Visualization of Epiretinal Macular Membrane

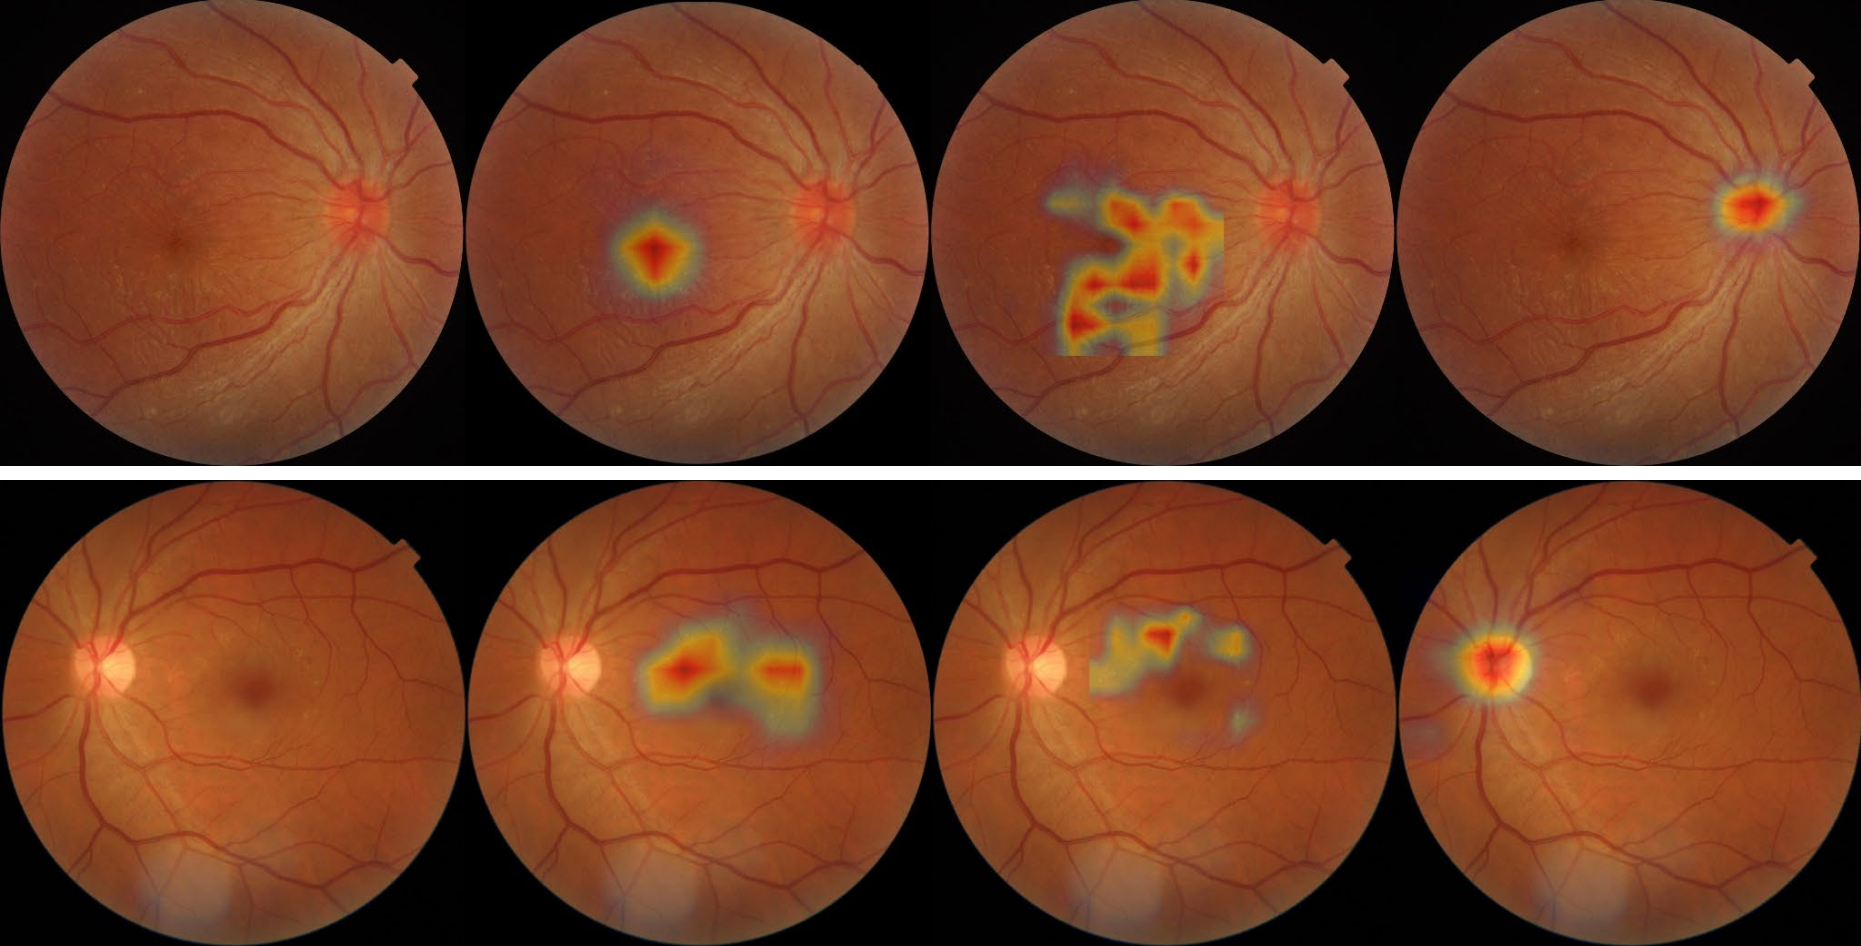



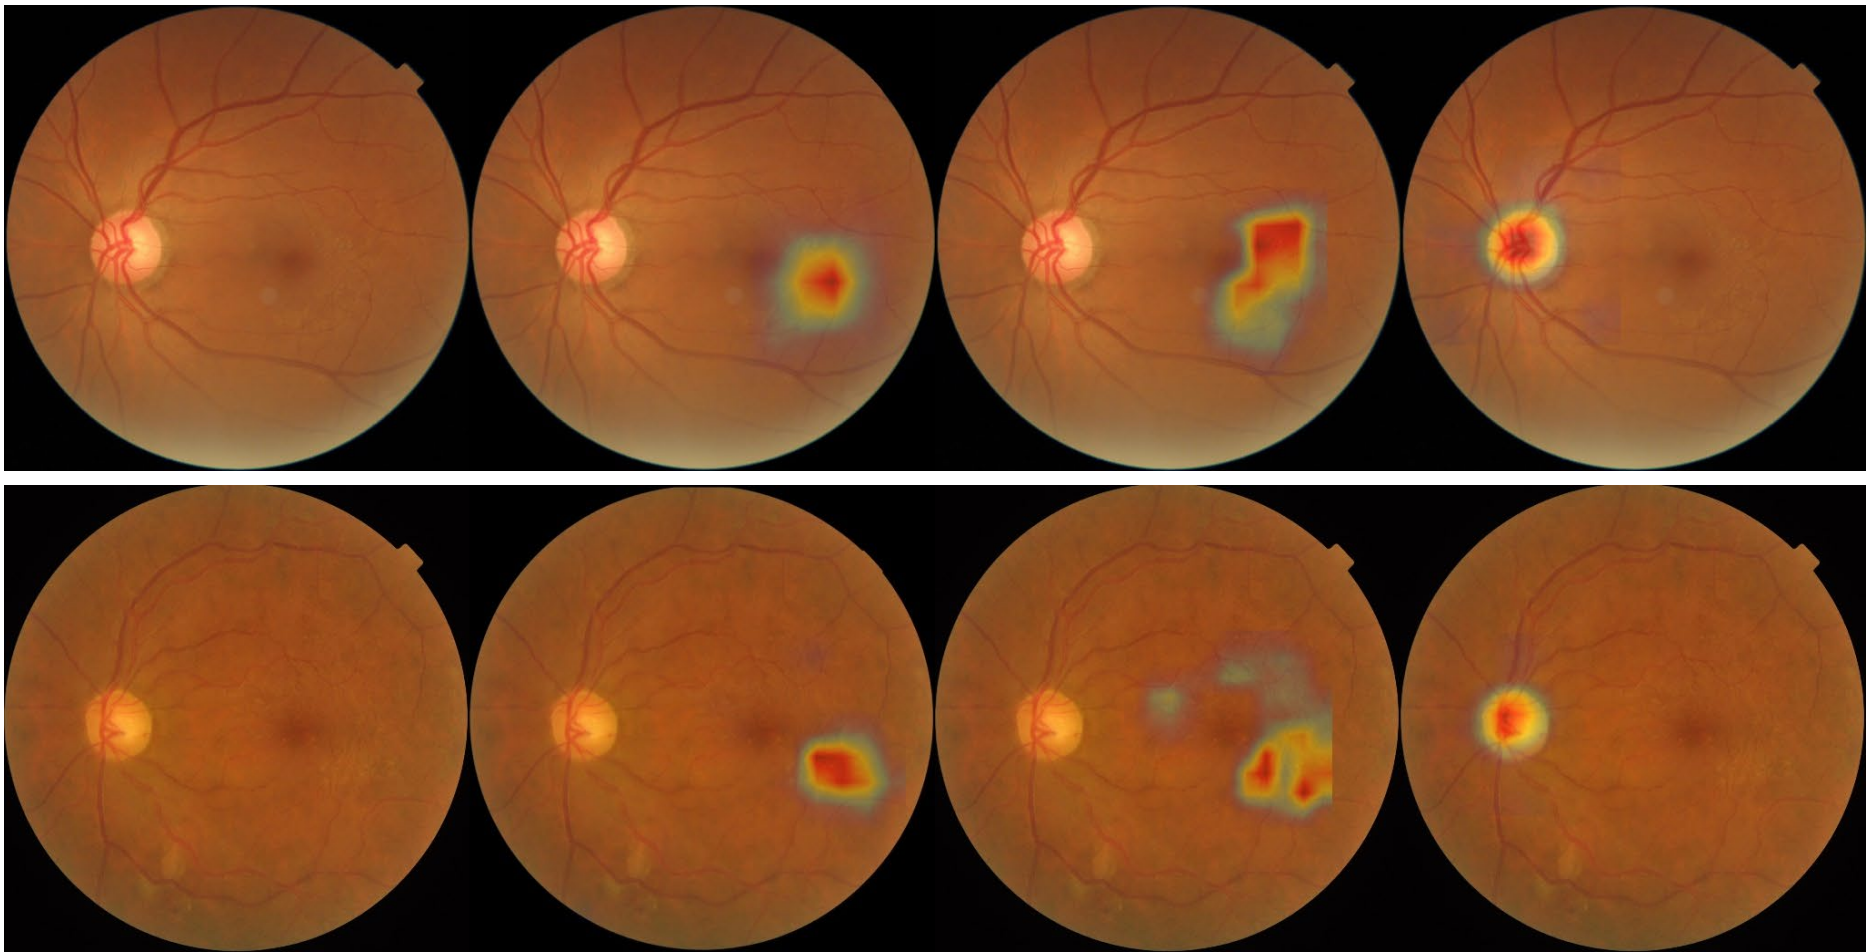

Heatmap demonstrating representative lesions, shown in original fundus image (first column), general heatmap (second column), macula heatmap (third column), and optic-disc heatmap (last column)

**eFigure 11.** Heatmap Visualization of Hypertensive Retinopathy

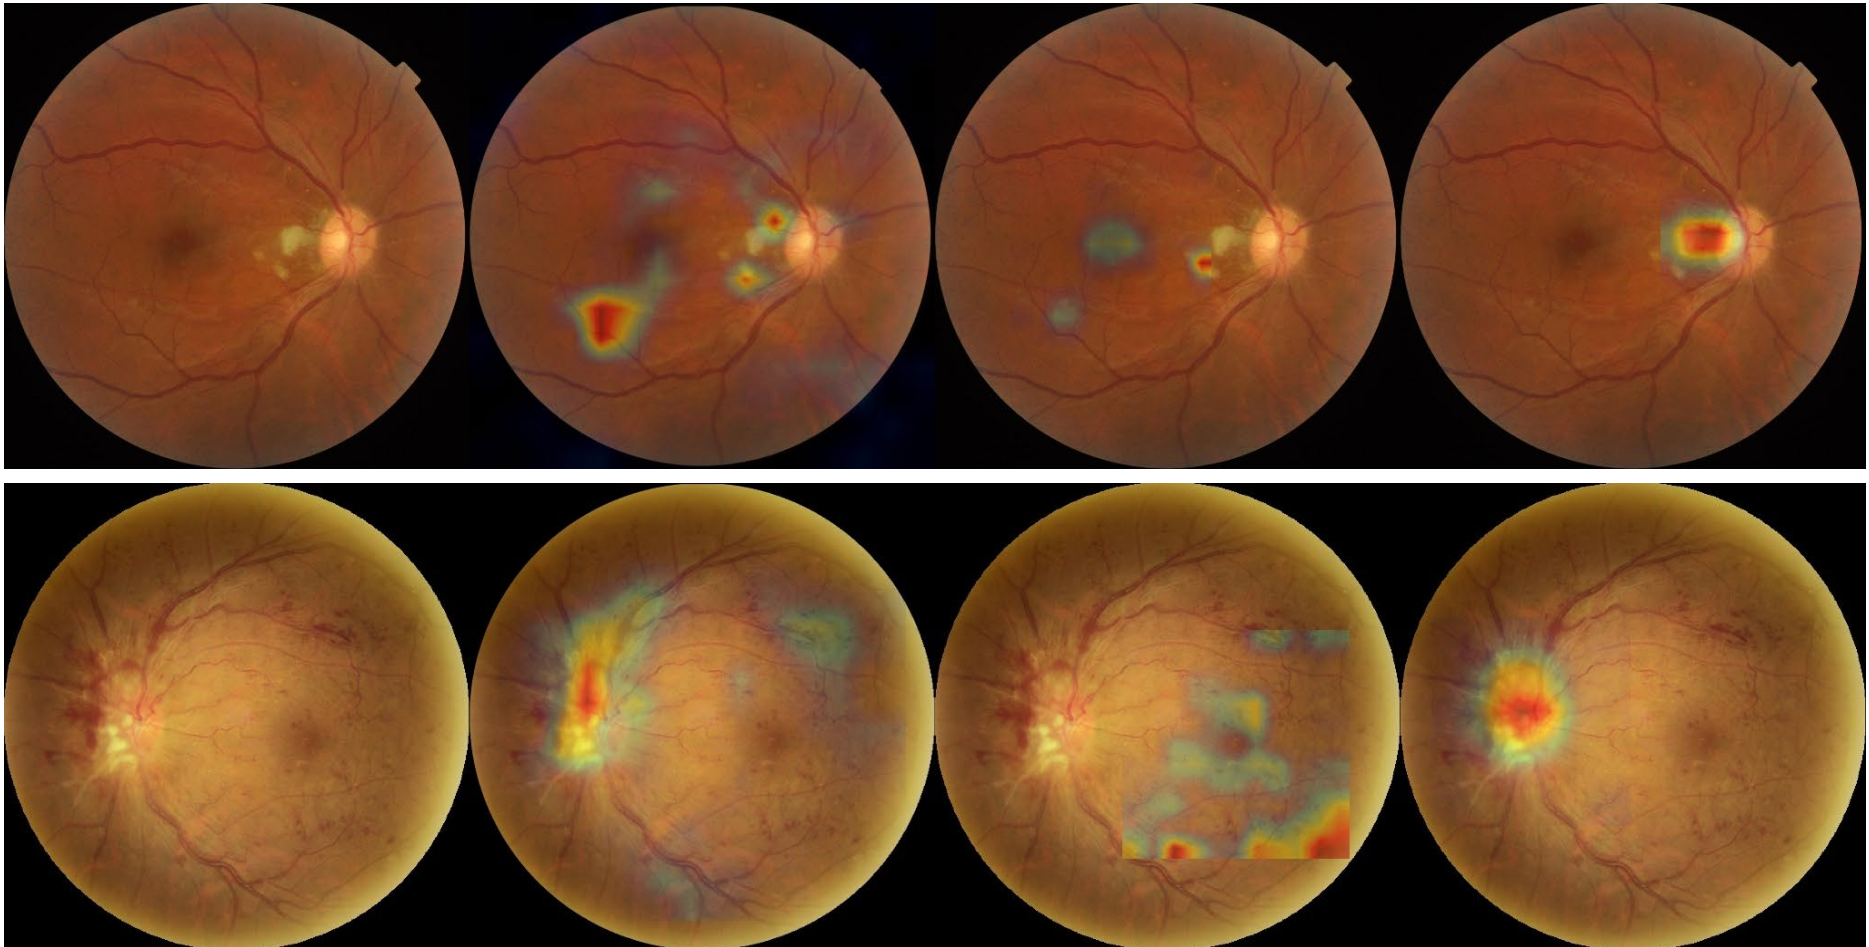



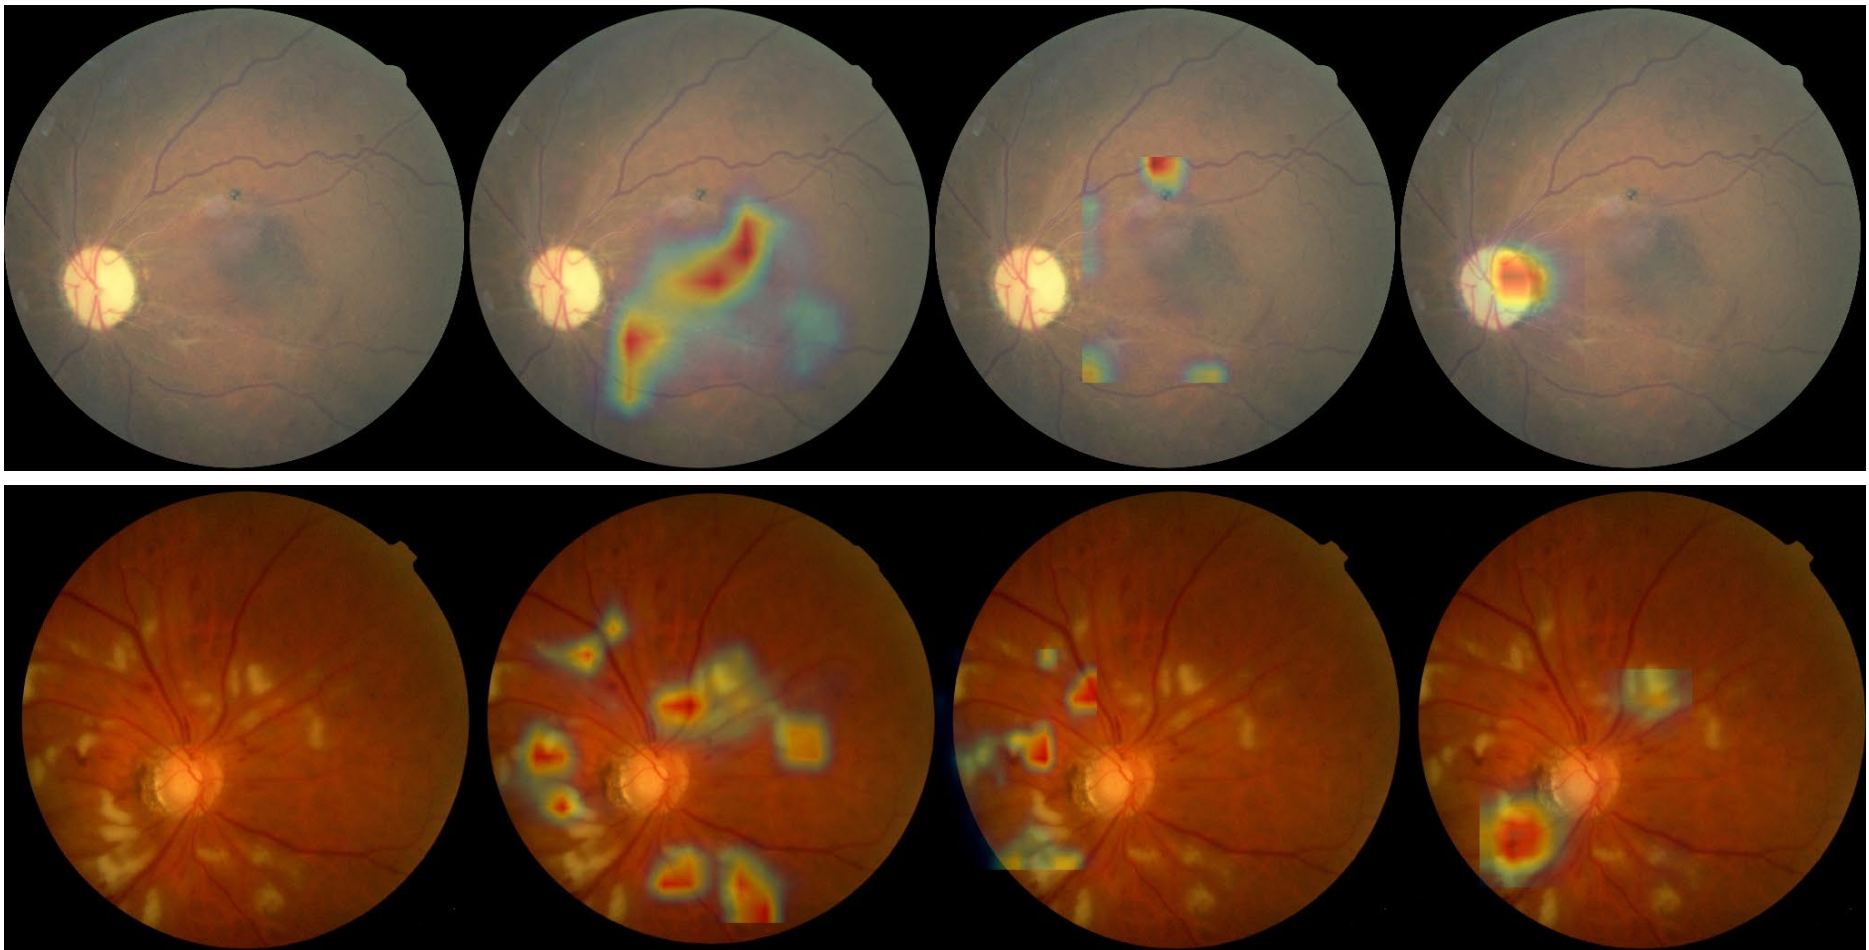

Heatmap demonstrating representative lesions, shown in original fundus image (first column), general heatmap (second column), macula heatmap (third column), and optic-disc heatmap (last column)

**eFigure 12.** Heatmap Visualization of Myelinated Fibers

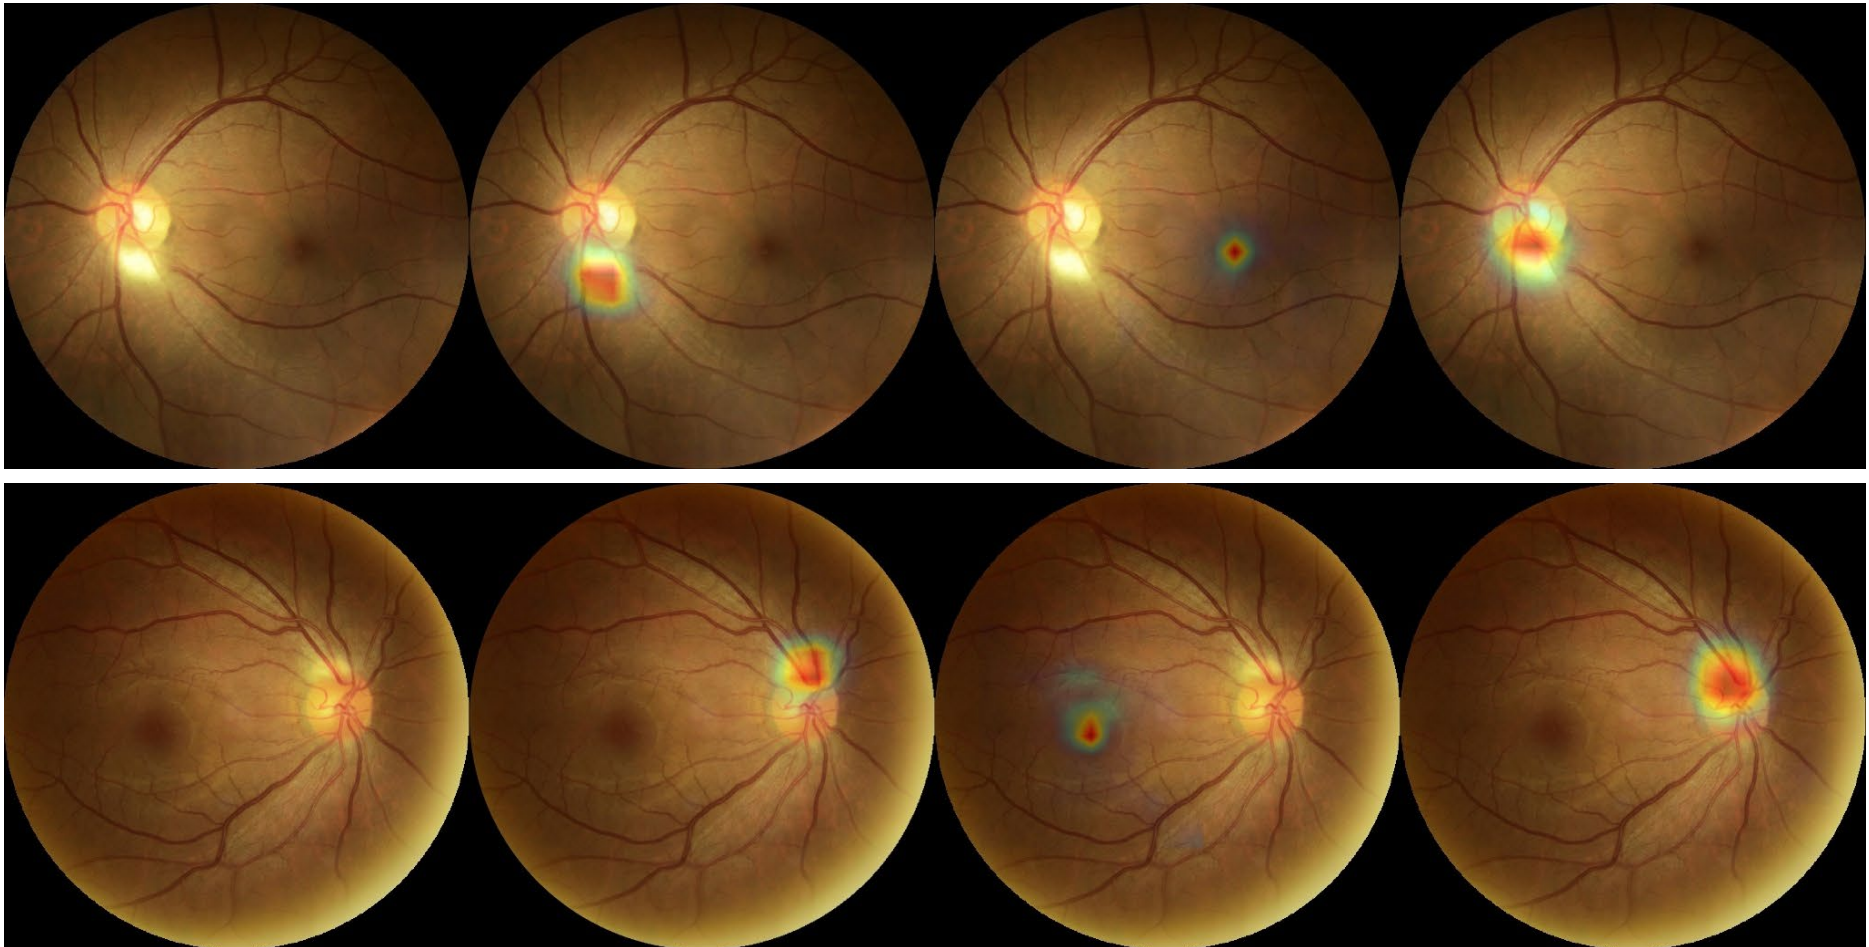

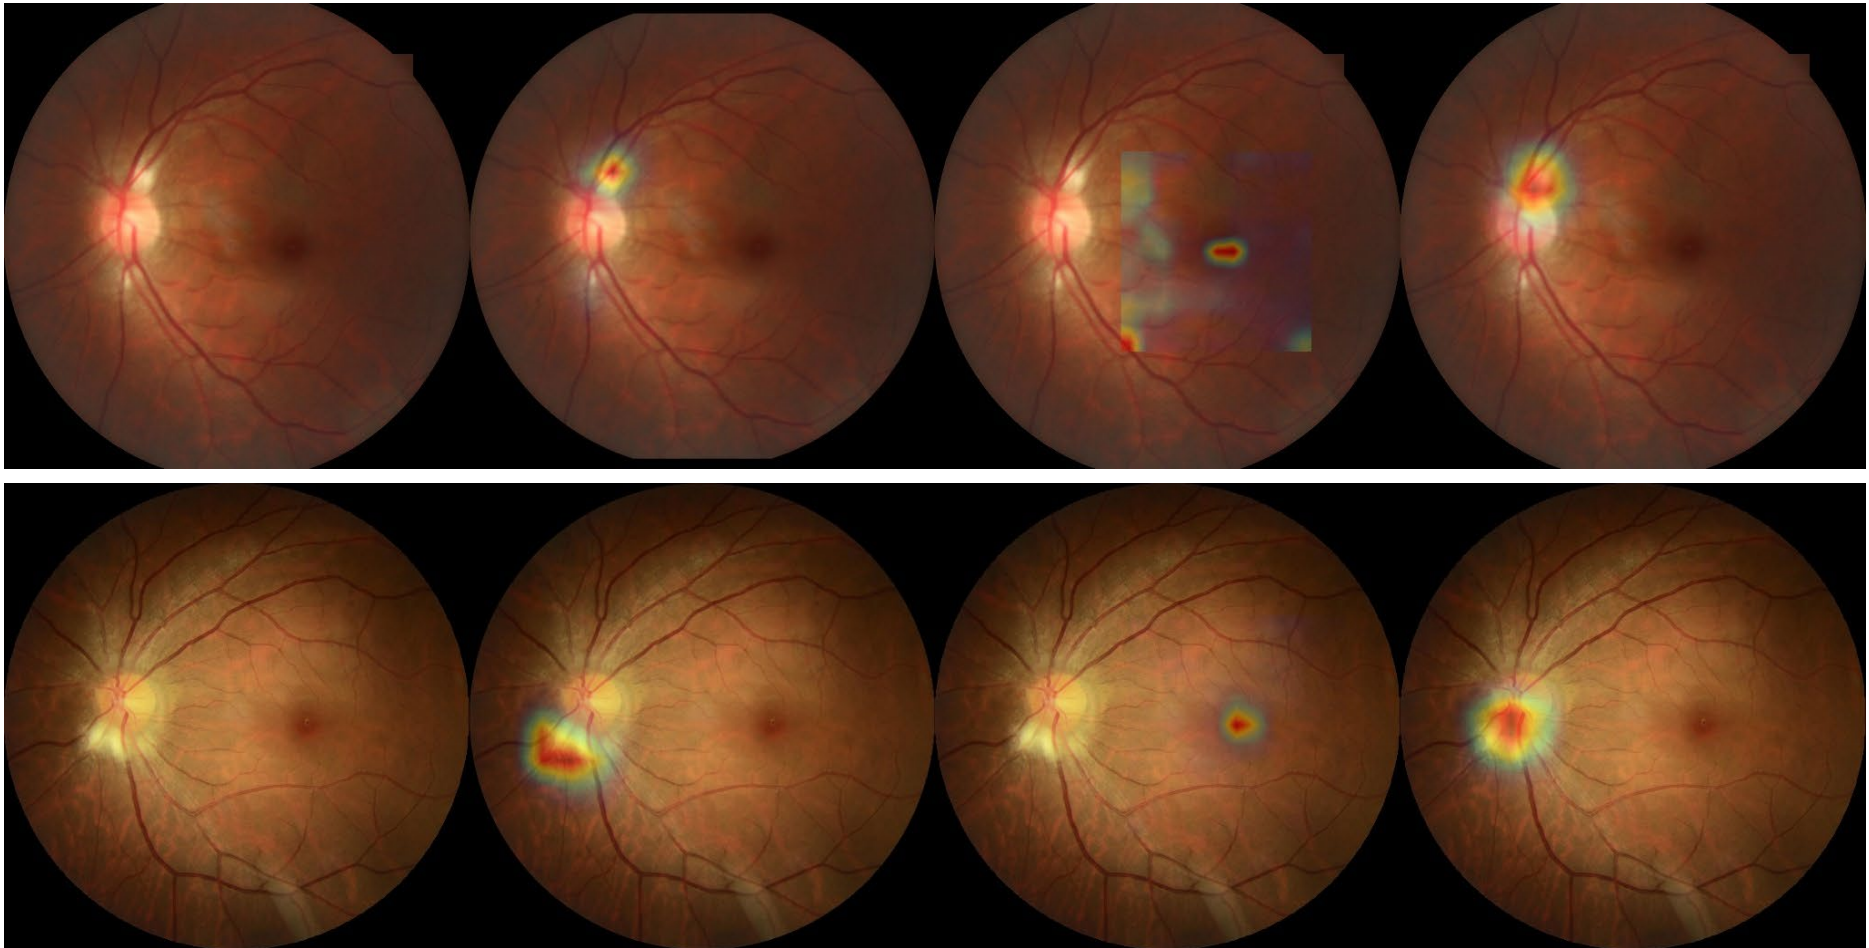

Heatmap demonstrating representative lesions, shown in original fundus image (first column), general heatmap (second column), macula heatmap (third column), and optic-disc heatmap (last column)



**eFigure 13.** Heatmap Visualization of Retinitis Pigmentosa

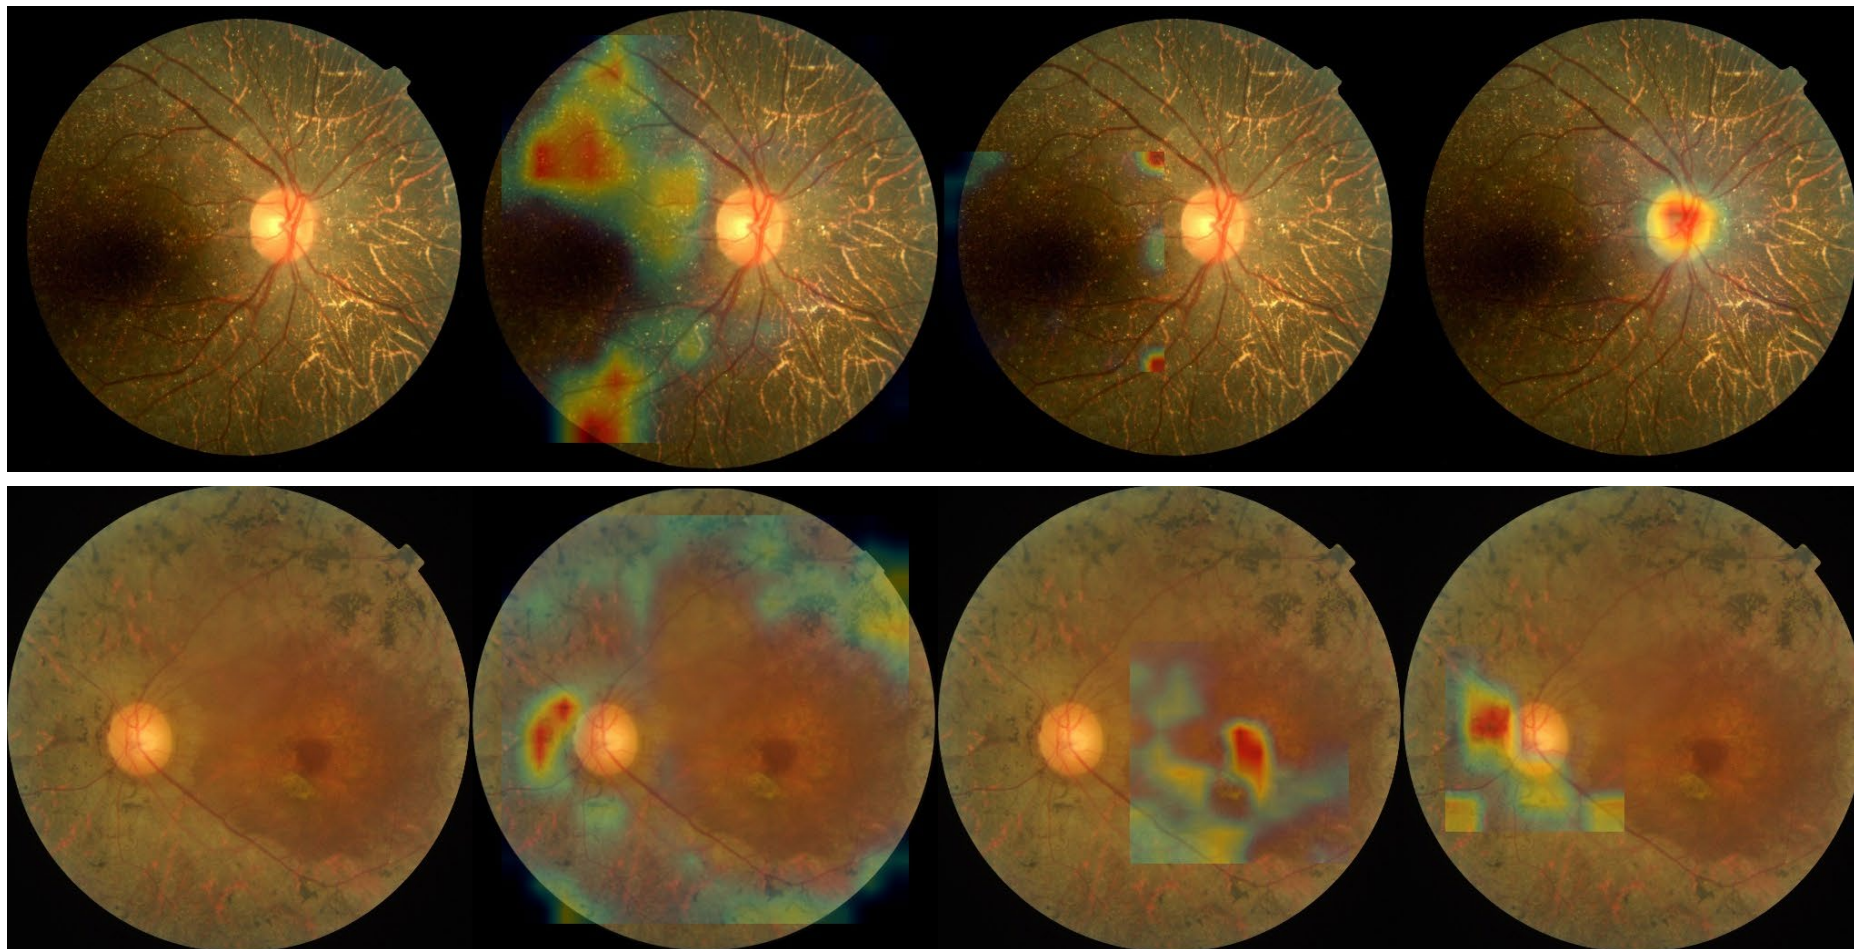

Heatmap demonstrating representative lesions, shown in original fundus image (first column), general heatmap (second column), macula heatmap (third column), and optic-disc heatmap (last column)

**eFigure 14.** Performance Comparison Between RAIDS and Human Ophthalmologists in Identifying Multiple Retinal Diseases

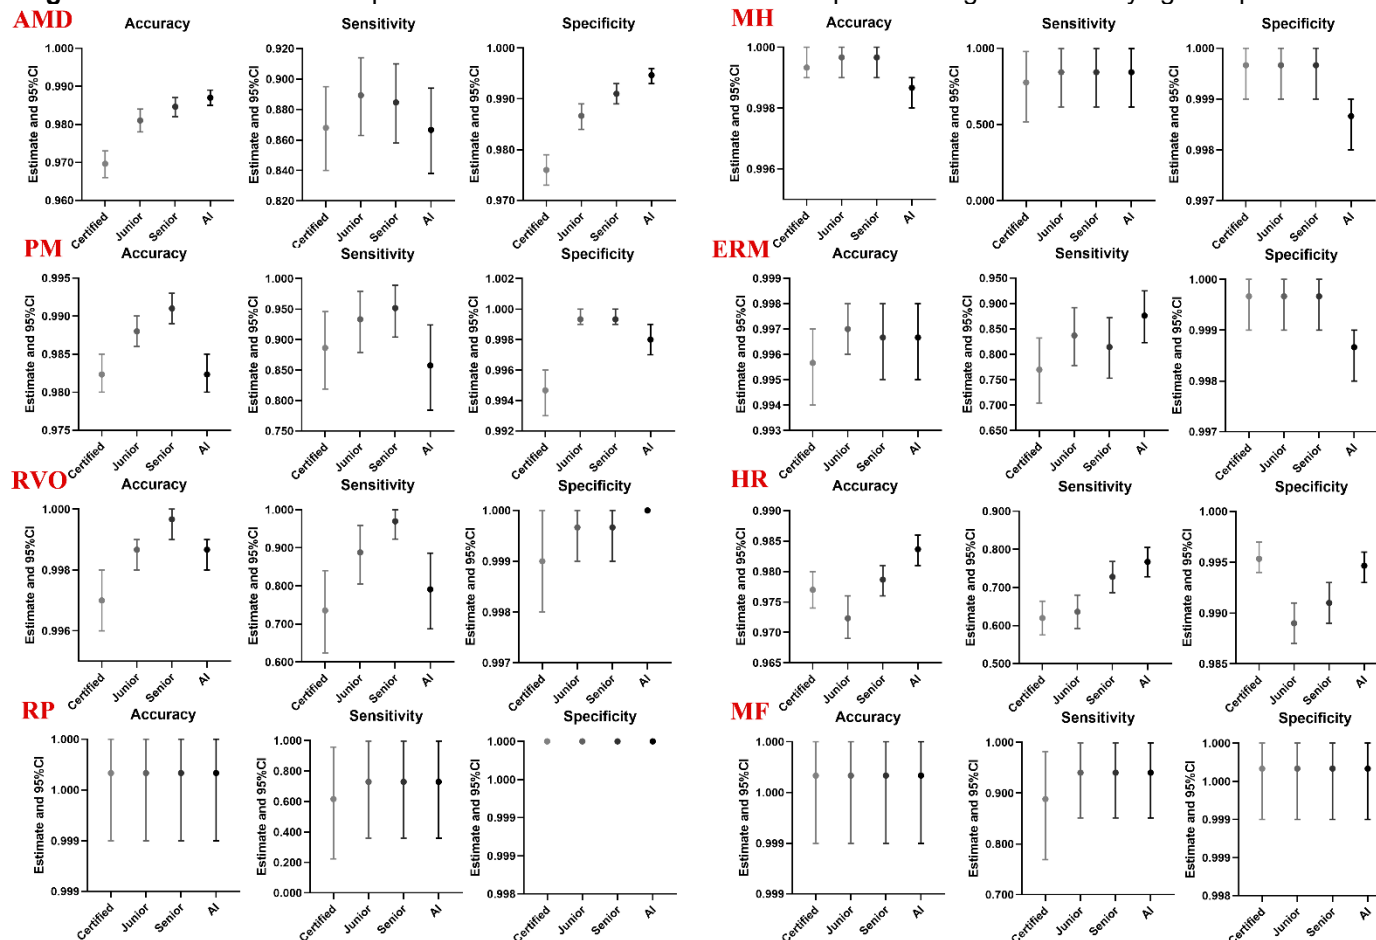

AMD, age-related macular degeneration; PM, pathologic myopia; ERM, epiretinal macular membrane; HR, hypertensive retinopathy; RVO, retinal vein occlusion; MH, macula hole; MF, myelinated fibers; RP, retinitis pigmentosa.

**eFigure 15.** Performance of RAIDS-Human Ophthalmologist Combination in Identifying Multiple Retinal Diseases

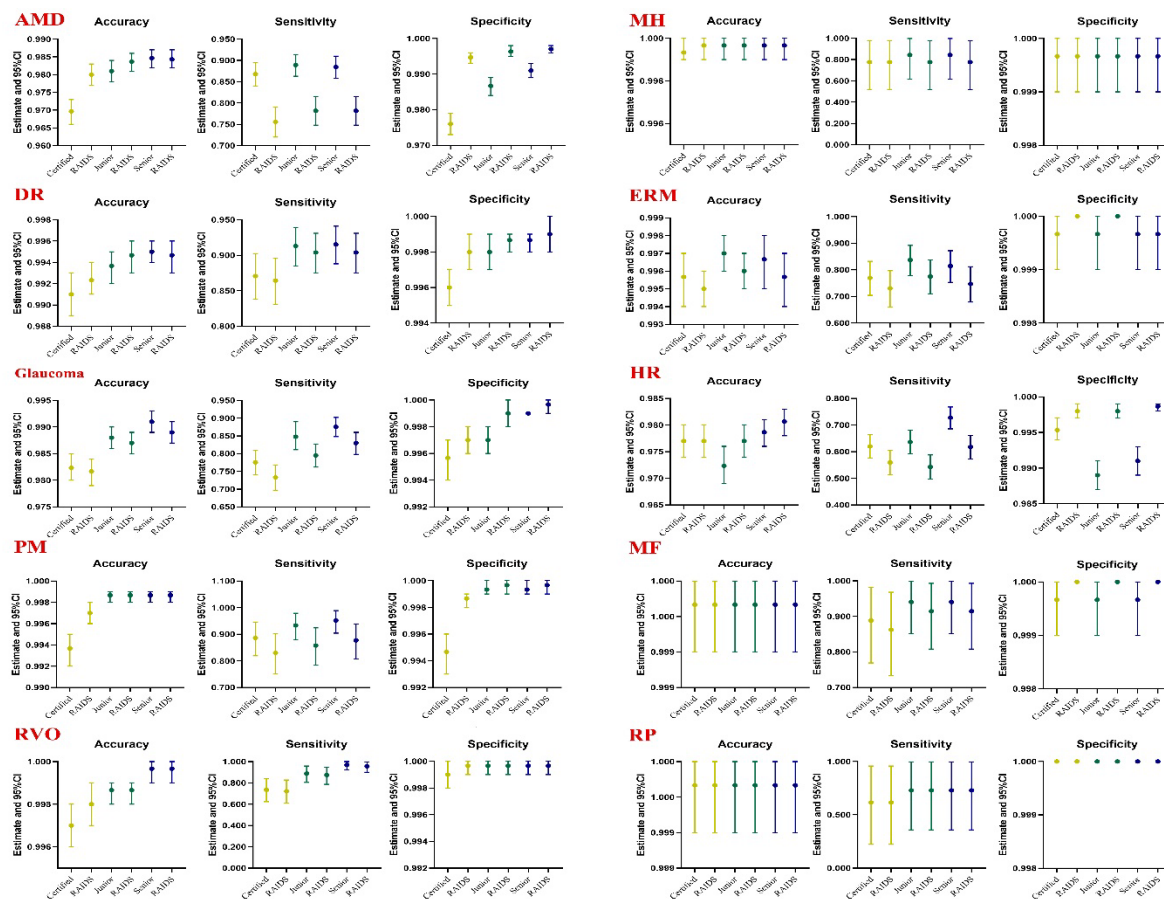

DR, referral DR; AMD, referral AMD; Glaucoma, referral possible glaucoma; PM, pathological myopia; RVO, retinal vein occlusion; MH, macula hole; ERM, epiretinal macular membrane; HR hypertensive retinopathy; MF, myelinated fibers; RP, retinitis pigmentosa.

**eTable 1.** Development Dataset Distributions of Retinal Diseases and Camera Manufacturers

(a)

|                             | Training dataset | Internal validation dataset |
|-----------------------------|------------------|-----------------------------|
| Normal                      | 53745            | 10749                       |
| Referral DR                 | 2875             | 575                         |
| Referral AMD                | 3840             | 768                         |
| Referral possible glaucoma  | 20395            | 4079                        |
| Pathological myopia         | 2520             | 504                         |
| Retinal vein occlusion      | 270              | 54                          |
| Macula hole                 | 160              | 32                          |
| Epiretinal macular membrane | 6100             | 1220                        |
| Hypertensive retinopathy    | 12300            | 2460                        |
| Myelinated fibers           | 1580             | 316                         |
| Retinitis pigmentosa        | 185              | 37                          |

(b)

| Manufacturer | Images (No.) |
|--------------|--------------|
| Crystalvue   | 157          |
| Nidek        | 448          |
| Kowa         | 583          |
| Zeiss        | 858          |
| Topcon       | 16121        |
| Syseye       | 43128        |
| Canon        | 56202        |
| Unknown      | 2505         |

**eTable 2.** Performance of the Retinal Artificial Intelligence Diagnosis System in the Internal Validation Dataset

|                             | Number of cases | Accuracy | Sensitivity | Specificity |
|-----------------------------|-----------------|----------|-------------|-------------|
| Normal                      | 10749           | 0.830    | 0.776       | 0.893       |
| Referral DR                 | 575             | 0.973    | 0.823       | 0.977       |
| Referral AMD                | 768             | 0.965    | 0.883       | 0.968       |
| Referral possible glaucoma  | 4079            | 0.926    | 0.825       | 0.952       |
| Pathological myopia         | 504             | 0.979    | 0.978       | 0.979       |
| Retinal vein occlusion      | 54              | 0.959    | 0.963       | 0.959       |
| Macula hole                 | 32              | 0.989    | 0.938       | 0.989       |
| Epiretinal macular membrane | 1220            | 0.968    | 0.903       | 0.972       |
| Hypertensive retinopathy    | 2460            | 0.792    | 0.745       | 0.798       |
| Myelinated fibers           | 316             | 0.997    | 0.883       | 0.999       |
| Retinitis pigmentosa        | 37              | 0.999    | 0.919       | 0.999       |



**eTable 3.** Performance of the Retinal Artificial Intelligence Diagnosis System (RAIDS) in Prospective Validation Dataset (A)

| Overall                     | Number of cases | Accuracy [95% CI]  | Specificity [95% CI] | Sensitivity [95% CI] | F1 score [95% CI]  |
|-----------------------------|-----------------|--------------------|----------------------|----------------------|--------------------|
| Normal                      | 170038          | 0.802[0.800-0.803] | 0.898[0.895-0.901]   | 0.780[0.778-0.782]   | 0.865[0.864-0.866] |
| Referral DR                 | 6508            | 0.981[0.980-0.982] | 0.986[0.985-0.986]   | 0.837[0.828-0.846]   | 0.734[0.727-0.741] |
| Referral AMD                | 7033            | 0.973[0.972-0.973] | 0.976[0.975-0.977]   | 0.881[0.873-0.888]   | 0.685[0.678-0.691] |
| Referral possible glaucoma  | 10214           | 0.943[0.942-0.944] | 0.950[0.949-0.951]   | 0.813[0.805-0.820]   | 0.583[0.578-0.589] |
| Pathological myopia         | 2105            | 0.984[0.983-0.984] | 0.984[0.983-0.984]   | 0.971[0.964-0.978]   | 0.547[0.535-0.558] |
| Retinal vein occlusion      | 703             | 0.974[0.973-0.975] | 0.974[0.973-0.975]   | 0.967[0.954-0.980]   | 0.200[0.191-0.210] |
| Macula hole                 | 235             | 0.996[0.995-0.996] | 0.996[0.995-0.996]   | 0.894[0.854-0.933]   | 0.314[0.289-0.339] |
| Epiretinal macular membrane | 4031            | 0.978[0.977-0.979] | 0.980[0.979-0.980]   | 0.891[0.881-0.901]   | 0.610[0.601-0.619] |
| Hypertensive retinopathy    | 8198            | 0.837[0.836-0.839] | 0.841[0.840-0.843]   | 0.741[0.732-0.751]   | 0.264[0.260-0.268] |
| Myelinated fibers           | 812             | 0.999[0.999-0.999] | 0.999[0.999-0.999]   | 0.917[0.899-0.936]   | 0.843[0.826-0.860] |
| Retinitis pigmentosa        | 90              | 0.999[0.999-1.000] | 0.999[0.999-1.000]   | 0.933[0.882-0.985]   | 0.598[0.541-0.655] |

CI: confidence interval, DR: diabetic retinopathy, AMD: age-related macular degeneration.

(b)

| Overall                     | General-AUC | Macula-AUC | Optic-disc-AUC |
|-----------------------------|-------------|------------|----------------|
| Normal                      | 0.851       | 0.922      | 0.894          |
| Referral DR                 | 0.983       | -          | -              |
| Epiretinal macular membrane | 0.987       | 0.975      | -              |
| Retinal vein occlusion      | 0.997       | -          | -              |
| Referral possible glaucoma  | 0.950       | -          | 0.951          |
| Macula hole                 | 0.991       | 0.991      | -              |
| Hypertensive retinopathy    | 0.891       | -          | -              |
| Myelinated fibers           | 0.987       | -          | -              |
| Referral AMD                | 0.986       | 0.978      | -              |
| Pathological myopia         | 0.996       | -          | -              |
| Retinitis pigmentosa        | 0.997       | -          | -              |

**eTable 4.** Performance of the Retinal Artificial Intelligence Diagnosis System in Identifying Multiple Retinal Diseases in East China

| East                        | Number of cases | Accuracy [95% CI]  | Specificity [95% CI] | Sensitivity [95% CI] | F1 score [95% CI]  |
|-----------------------------|-----------------|--------------------|----------------------|----------------------|--------------------|
| Normal                      | 64948           | 0.791[0.788-0.794] | 0.895[0.890-0.900]   | 0.768[0.765-0.771]   | 0.858[0.856-0.860] |
| Referral DR                 | 2046            | 0.983[0.982-0.984] | 0.987[0.986-0.987]   | 0.847[0.831-0.862]   | 0.720[0.707-0.732] |
| Referral AMD                | 2851            | 0.970[0.969-0.971] | 0.973[0.972-0.974]   | 0.879[0.867-0.891]   | 0.677[0.667-0.688] |
| Referral possible glaucoma  | 3871            | 0.941[0.939-0.943] | 0.948[0.947-0.950]   | 0.805[0.793-0.818]   | 0.572[0.562-0.581] |
| Pathological myopia         | 1000            | 0.980[0.979-0.981] | 0.980[0.979-0.981]   | 0.973[0.963-0.983]   | 0.553[0.537-0.569] |
| Retinal vein occlusion      | 257             | 0.978[0.977-0.979] | 0.978[0.977-0.979]   | 0.946[0.918-0.973]   | 0.216[0.199-0.233] |
| Macula hole                 | 78              | 0.996[0.995-0.996] | 0.996[0.996-0.996]   | 0.846[0.766-0.926]   | 0.284[0.243-0.326] |
| Epiretinal macular membrane | 1525            | 0.977[0.976-0.978] | 0.978[0.977-0.979]   | 0.906[0.892-0.921]   | 0.600[0.585-0.614] |
| Hypertensive retinopathy    | 2825            | 0.845[0.842-0.847] | 0.850[0.847-0.852]   | 0.716[0.700-0.733]   | 0.247[0.241-0.254] |
| Myelinated fibers           | 321             | 0.999[0.998-0.999] | 0.999[0.999-0.999]   | 0.938[0.911-0.964]   | 0.837[0.810-0.864] |
| Retinitis pigmentosa        | 34              | 0.999[0.999-1.000] | 0.999[0.999-1.000]   | 0.971[0.914-1.000]   | 0.559[0.470-0.649] |

CI: confidence interval, DR: diabetic retinopathy, AMD: age-related macular degeneration.

**eTable 5.** Performance of the Retinal Artificial Intelligence Diagnosis System in Identifying Multiple Retinal Diseases in North China

| North                       | Number of cases | Accuracy [95% CI]  | Specificity [95% CI] | Sensitivity [95% CI] | F1 score [95% CI]  |
|-----------------------------|-----------------|--------------------|----------------------|----------------------|--------------------|
| Normal                      | 55463           | 0.799[0.796-0.802] | 0.904[0.899-0.908]   | 0.773[0.770-0.777]   | 0.860[0.858-0.863] |
| Referral DR                 | 2642            | 0.980[0.979-0.981] | 0.985[0.984-0.986]   | 0.836[0.822-0.850]   | 0.758[0.747-0.769] |
| Referral AMD                | 2308            | 0.972[0.971-0.974] | 0.975[0.974-0.977]   | 0.886[0.873-0.899]   | 0.682[0.670-0.694] |
| Referral possible glaucoma  | 3352            | 0.944[0.942-0.946] | 0.950[0.948-0.952]   | 0.824[0.811-0.837]   | 0.588[0.578-0.598] |
| Pathological myopia         | 449             | 0.988[0.987-0.989] | 0.988[0.987-0.989]   | 0.962[0.944-0.980]   | 0.505[0.482-0.529] |
| Retinal vein occlusion      | 264             | 0.967[0.966-0.968] | 0.967[0.966-0.968]   | 0.989[0.976-1.000]   | 0.186[0.172-0.201] |
| Macula hole                 | 92              | 0.995[0.995-0.996] | 0.995[0.995-0.996]   | 0.913[0.855-0.971]   | 0.340[0.298-0.382] |
| Epiretinal macular membrane | 1380            | 0.976[0.975-0.977] | 0.978[0.977-0.979]   | 0.884[0.867-0.901]   | 0.598[0.583-0.613] |
| Hypertensive retinopathy    | 3487            | 0.813[0.810-0.816] | 0.815[0.812-0.818]   | 0.781[0.767-0.795]   | 0.296[0.290-0.303] |
| Myelinated fibers           | 241             | 0.999[0.998-0.999] | 0.999[0.999-0.999]   | 0.892[0.853-0.931]   | 0.825[0.793-0.858] |
| Retinitis pigmentosa        | 16              | 0.999[0.999-1.000] | 0.999[0.999-1.000]   | 0.938[0.819-1.000]   | 0.448[0.329-0.567] |

CI: confidence interval, DR: diabetic retinopathy, AMD: age-related macular degeneration.

**eTable 6.** Performance of the Retinal Artificial Intelligence Diagnosis System Identifying Multiple Retinal Diseases in South China

| South                       | Number of cases | Accuracy [95% CI]  | Specificity [95% CI] | Sensitivity [95% CI] | F1 score [95% CI]  |
|-----------------------------|-----------------|--------------------|----------------------|----------------------|--------------------|
| Normal                      | 21984           | 0.823[0.819-0.828] | 0.890[0.880-0.900]   | 0.812[0.807-0.818]   | 0.888[0.885-0.891] |
| Referral DR                 | 500             | 0.985[0.984-0.987] | 0.988[0.987-0.990]   | 0.834[0.801-0.867]   | 0.689[0.663-0.715] |
| Referral AMD                | 708             | 0.978[0.976-0.980] | 0.980[0.979-0.982]   | 0.888[0.865-0.912]   | 0.690[0.669-0.712] |
| Referral possible glaucoma  | 1142            | 0.942[0.939-0.944] | 0.947[0.944-0.950]   | 0.824[0.802-0.846]   | 0.557[0.540-0.574] |
| Pathological myopia         | 185             | 0.986[0.985-0.988] | 0.986[0.985-0.988]   | 0.968[0.942-0.993]   | 0.503[0.466-0.540] |
| Retinal vein occlusion      | 43              | 0.983[0.981-0.985] | 0.983[0.981-0.985]   | 0.907[0.820-0.994]   | 0.152[0.121-0.183] |
| Macula hole                 | 25              | 0.996[0.995-0.996] | 0.996[0.995-0.997]   | 0.880[0.753-1.000]   | 0.284[0.213-0.355] |
| Epiretinal macular membrane | 445             | 0.982[0.980-0.983] | 0.983[0.982-0.985]   | 0.892[0.863-0.921]   | 0.627[0.601-0.654] |
| Hypertensive retinopathy    | 534             | 0.883[0.879-0.887] | 0.887[0.883-0.891]   | 0.678[0.638-0.718]   | 0.194[0.182-0.207] |
| Myelinated fibers           | 89              | 0.999[0.998-0.999] | 0.999[0.999-0.999]   | 0.888[0.822-0.953]   | 0.832[0.778-0.885] |
| Retinitis pigmentosa        | 13              | 0.999[0.999-1.000] | 1.000[0.999-1.000]   | 0.846[0.650-1.000]   | 0.629[0.468-0.789] |

CI: confidence interval, DR: diabetic retinopathy, AMD: age-related macular degeneration.

**eTable 7.** Performance of the Retinal Artificial Intelligence Diagnosis System in Identifying Multiple Retinal Diseases in West China

| West                        | Number of cases | Accuracy [95% CI]  | Specificity [95% CI] | Sensitivity [95% CI] | F1 score [95% CI]  |
|-----------------------------|-----------------|--------------------|----------------------|----------------------|--------------------|
| Normal                      | 27643           | 0.815[0.811-0.819] | 0.895[0.888-0.902]   | 0.795[0.790-0.800]   | 0.873[0.870-0.876] |
| Referral DR                 | 1320            | 0.977[0.975-0.978] | 0.983[0.981-0.984]   | 0.823[0.803-0.844]   | 0.728[0.712-0.744] |
| Referral AMD                | 1166            | 0.975[0.974-0.977] | 0.979[0.978-0.981]   | 0.870[0.851-0.890]   | 0.705[0.688-0.722] |
| Referral possible glaucoma  | 1849            | 0.948[0.945-0.950] | 0.956[0.954-0.958]   | 0.802[0.784-0.820]   | 0.620[0.606-0.634] |
| Pathological myopia         | 471             | 0.982[0.981-0.984] | 0.982[0.981-0.984]   | 0.977[0.963-0.990]   | 0.598[0.573-0.622] |
| Retinal vein occlusion      | 139             | 0.973[0.971-0.974] | 0.972[0.971-0.974]   | 0.986[0.966-1.000]   | 0.224[0.200-0.247] |
| Macula hole                 | 40              | 0.996[0.995-0.996] | 0.996[0.995-0.996]   | 0.950[0.882-1.000]   | 0.339[0.277-0.401] |
| Epiretinal macular membrane | 681             | 0.982[0.980-0.983] | 0.984[0.983-0.985]   | 0.871[0.846-0.896]   | 0.653[0.632-0.675] |
| Hypertensive retinopathy    | 1352            | 0.835[0.831-0.839] | 0.840[0.836-0.844]   | 0.717[0.693-0.741]   | 0.253[0.243-0.263] |
| Myelinated fibers           | 161             | 0.999[0.999-0.999] | 0.999[0.999-1.000]   | 0.932[0.893-0.971]   | 0.888[0.854-0.921] |
| Retinitis pigmentosa        | 27              | 1.000[0.999-1.000] | 1.000[1.000-1.000]   | 0.926[0.827-1.000]   | 0.820[0.723-0.916] |

CI: confidence interval, DR: diabetic retinopathy, AMD: age-related macular degeneration.

**eTable 8.** Baseline Characteristics of Participants in the Reader Study

|                             | Beijing Eye study (n=5084) | Kailuan Eye study (n=5000) | Total (n=10084) |
|-----------------------------|----------------------------|----------------------------|-----------------|
| Number of participants      | 1624                       | 1918                       | 3542            |
| Mean age (range)/years      | 62 (50-89)                 | 48 (20-85)                 | 52 (20-89)      |
| Female (%)                  | 55.3%                      | 37.0%                      | 45.4%           |
| Normal                      | 3991                       | 3719                       | 7710            |
| Referral DR                 | 192                        | 255                        | 447             |
| Referral AMD                | 219                        | 385                        | 604             |
| Referral possible glaucoma  | 322                        | 286                        | 608             |
| Pathological myopia         | 61                         | 43                         | 104             |
| Retinal vein occlusion      | 34                         | 36                         | 70              |
| Macula hole                 | 6                          | 6                          | 12              |
| Epiretinal macular membrane | 89                         | 87                         | 176             |
| Hypertensive retinopathy    | 232                        | 247                        | 479             |
| Myelinated fibers           | 25                         | 10                         | 35              |
| Retinitis pigmentosa        | 0                          | 6                          | 6               |

**eTable 9.** Performance of Human Ophthalmologists in Identifying Multiple Retinal Diseases in the Reader Study

|                            | Number of cases | Human ophthalmologists     | Accuracy            | Specificity         | Sensitivity         |
|----------------------------|-----------------|----------------------------|---------------------|---------------------|---------------------|
|                            |                 |                            | [95% CI]            | [95% CI]            | [95% CI]            |
| Normal                     | 7710            | Certified ophthalmologists | 0.930 [0.924-0.935] | 0.837 [0.821-0.851] | 0.958 [0.954-0.963] |
|                            |                 | Junior retinal specialists | 0.945 [0.940-0.949] | 0.864 [0.849-0.877] | 0.970 [0.965-0.973] |
|                            |                 | Senior retinal specialists | 0.945 [0.940-0.949] | 0.885 [0.871-0.898] | 0.978 [0.975-0.982] |
|                            |                 | RAIDS                      | 0.953 [0.949-0.957] | 0.917 [0.906-0.928] | 0.964 [0.960-0.968] |
| Referral DR                | 447             | Certified ophthalmologists | 0.991 [0.989-0.993] | 0.996 [0.995-0.997] | 0.872 [0.838-0.902] |
|                            |                 | Junior retinal specialists | 0.994 [0.992-0.995] | 0.998 [0.997-0.999] | 0.915 [0.885-0.939] |
|                            |                 | Senior retinal specialists | 0.995 [0.994-0.996] | 0.999 [0.998-0.999] | 0.917 [0.888-0.941] |
|                            |                 | RAIDS                      | 0.985 [0.982-0.987] | 0.985 [0.983-0.987] | 0.973 [0.954-0.986] |
| Referral AMD               | 604             | Certified ophthalmologists | 0.970 [0.966-0.973] | 0.976 [0.973-0.979] | 0.869 [0.840-0.895] |
|                            |                 | Junior retinal specialists | 0.981 [0.978-0.984] | 0.987 [0.984-0.989] | 0.891 [0.863-0.914] |
|                            |                 | Senior retinal specialists | 0.985 [0.982-0.987] | 0.991 [0.989-0.993] | 0.886 [0.858-0.910] |
|                            |                 | RAIDS                      | 0.987 [0.985-0.989] | 0.995 [0.993-0.996] | 0.868 [0.838-0.894] |
| Referral possible glaucoma | 608             | Certified ophthalmologists | 0.982 [0.980-0.985] | 0.996 [0.994-0.997] | 0.776 [0.741-0.809] |
|                            |                 | Junior retinal specialists | 0.988 [0.986-0.990] | 0.997 [0.996-0.998] | 0.842 [0.811-0.890] |
|                            |                 | Senior retinal specialists | 0.991 [0.989-0.993] | 0.999 [0.999-0.999] | 0.877 [0.848-0.902] |
|                            |                 | RAIDS                      | 0.982 [0.980-0.985] | 0.985 [0.982-0.987] | 0.942 [0.921-0.960] |

N=10,084

|                             | Number of cases | Human ophthalmologists     | Accuracy            | Specificity         | Sensitivity         |
|-----------------------------|-----------------|----------------------------|---------------------|---------------------|---------------------|
| Pathological myopia         | 104             | Certified ophthalmologists | 0.994 [0.992-0.995] | 0.995 [0.993-0.996] | 0.894 [0.819-0.946] |
|                             |                 | Junior retinal specialists | 0.999 [0.998-0.999] | 0.999 [0.999-1.000] | 0.942 [0.879-0.979] |
|                             |                 | Senior retinal specialists | 0.999 [0.998-0.999] | 0.999 [0.999-1.000] | 0.962 [0.904-0.989] |
|                             |                 | RAIDS                      | 0.996 [0.995-0.998] | 0.998 [0.997-0.999] | 0.865 [0.784-0.924] |
| Retinal vein occlusion      | 70              | Certified ophthalmologists | 0.997 [0.996-0.998] | 0.999 [0.998-1.000] | 0.743 [0.624-0.840] |
|                             |                 | Junior retinal specialists | 0.999 [0.998-0.999] | 1.000 [0.999-1.000] | 0.900 [0.805-0.959] |
|                             |                 | Senior retinal specialists | 1.000 [0.999-1.000] | 1.000 [0.999-1.000] | 0.986 [0.923-1.000] |
|                             |                 | RAIDS                      | 0.999 [0.998-0.999] | 1.000 [1.000-1.000] | 0.800 [0.687-0.886] |
| Macula hole                 | 12              | Certified ophthalmologists | 0.999 [0.999-1.000] | 1.000 [0.999-1.000] | 0.833 [0.516-0.979] |
|                             |                 | Junior retinal specialists | 1.000 [0.999-1.000] | 1.000 [0.999-1.000] | 0.917 [0.615-0.998] |
|                             |                 | Senior retinal specialists | 1.000 [0.999-1.000] | 1.000 [0.999-1.000] | 0.917 [0.615-0.998] |
|                             |                 | RAIDS                      | 0.999 [0.998-0.999] | 0.999 [0.998-0.999] | 0.917 [0.615-0.998] |
| Epiretinal macular membrane | 176             | Certified ophthalmologists | 0.996 [0.994-0.997] | 1.000 [0.999-1.000] | 0.773 [0.704-0.832] |
|                             |                 | Junior retinal specialists | 0.997 [0.996-0.998] | 1.000 [0.999-1.000] | 0.841 [0.778-0.892] |
|                             |                 | Senior retinal specialists | 0.997 [0.995-0.998] | 1.000 [0.999-1.000] | 0.818 [0.753-0.872] |
|                             |                 | RAIDS                      | 0.997 [0.995-0.998] | 0.999 [0.998-0.999] | 0.881 [0.823-0.925] |
| Hypertensive retinopathy    | 479             | Certified ophthalmologists | 0.977 [0.974-0.980] | 0.995 [0.994-0.997] | 0.620 [0.575-0.664] |
|                             |                 | Junior retinal specialists | 0.972 [0.969-0.976] | 0.989 [0.987-0.991] | 0.637 [0.592-0.680] |
|                             |                 | Senior retinal specialists | 0.979 [0.976-0.981] | 0.991 [0.989-0.993] | 0.729 [0.686-0.768] |
|                             |                 | RAIDS                      | 0.984 [0.981-0.986] | 0.995 [0.993-0.996] | 0.768 [0.728-0.805] |



|                      | Number of cases | Human ophthalmologists     | Accuracy            | Specificity         | Sensitivity         |
|----------------------|-----------------|----------------------------|---------------------|---------------------|---------------------|
| Myelinated fibers    | 35              | Certified ophthalmologists | 1.000 [0.999-1.000] | 1.000 [0.999-1.000] | 0.914 [0.769-0.982] |
|                      |                 | Junior retinal specialists | 1.000 [0.999-1.000] | 1.000 [0.999-1.000] | 0.971 [0.851-0.999] |
|                      |                 | Senior retinal specialists | 1.000 [0.999-1.000] | 1.000 [0.999-1.000] | 0.971 [0.851-0.999] |
|                      |                 | RAIDS                      | 1.000 [0.999-1.000] | 1.000 [0.999-1.000] | 0.971 [0.851-0.999] |
| Retinitis pigmentosa | 6               | Certified ophthalmologists | 1.000 [0.999-1.000] | 1.000 [1.000-1.000] | 0.667 [0.223-0.957] |
|                      |                 | Junior retinal specialists | 1.000 [0.999-1.000] | 1.000 [1.000-1.000] | 0.833 [0.359-0.996] |
|                      |                 | Senior retinal specialists | 1.000 [0.999-1.000] | 1.000 [1.000-1.000] | 0.833 [0.359-0.996] |
|                      |                 | RAIDS                      | 1.000 [0.999-1.000] | 1.000 [1.000-1.000] | 0.833 [0.359-0.996] |

RAIDS: Retinal Artificial Intelligence Diagnosis System, CI: confidence interval, DR: diabetic retinopathy, AMD: age-related macular degeneration.

**eTable 10.** K Scores Between Retinal Artificial Intelligence Diagnosis System and Different Groups of Human Experts in the Reader Study

| Abnormalities               | Certified ophthalmologist | Junior retinal specialist | Senior retinal specialist |
|-----------------------------|---------------------------|---------------------------|---------------------------|
| Normal                      | 0.7221                    | 0.7390                    | 0.7635                    |
| Referral DR                 | 0.6463                    | 0.7173                    | 0.7351                    |
| Referral AMD                | 0.6463                    | 0.7173                    | 0.7351                    |
| Referral possible glaucoma  | 0.7397                    | 0.7670                    | 0.7906                    |
| Pathological myopia         | 0.6598                    | 0.7904                    | 0.8015                    |
| Retinal vein occlusion      | 0.7572                    | 0.8215                    | 0.8518                    |
| Macula hole                 | 0.5255                    | 0.5255                    | 0.5548                    |
| Epiretinal macular membrane | 0.8103                    | 0.8147                    | 0.7930                    |
| Hypertensive retinopathy    | 0.6501                    | 0.5473                    | 0.6095                    |
| Myelinated fibers           | 0.8728                    | 0.8915                    | 0.8915                    |
| Retinitis pigmentosa        | 0.8888                    | 0.7999                    | 0.7999                    |
| Average                     | 0.7199                    | 0.7392                    | 0.7569                    |

DR: diabetic retinopathy, AMD: age-related macular degeneration.

**eTable 11.** Intergroup Correlation Between Ophthalmologists.

| Group 1                    | Group 2                    | Kappa score |
|----------------------------|----------------------------|-------------|
| Certified ophthalmologists | Junior retinal specialists | 0.794       |
| Certified ophthalmologists | Senior retinal specialists | 0.769       |
| Junior retinal specialists | Senior retinal specialists | 0.912       |

**eTable 12.** Efficiency Analysis of the DL Algorithm vs Human Ophthalmologists in Identifying Multiple Retinal Diseases in the Reader Study

|                                     | Time cost per photograph (second) |
|-------------------------------------|-----------------------------------|
| RAIDS                               | 0.30                              |
| Certified ophthalmologists          | 10.88                             |
| Junior retinal specialists          | 8.68                              |
| Senior retinal specialists          | 7.68                              |
| RAIDS + certified ophthalmologists† | 2.95                              |
| RAIDS + junior retinal specialists† | 2.40                              |
| RAIDS + senior retinal specialists† | 2.15                              |

† DL algorithm screened all images to filter the normal images as the first reader, and then human ophthalmologists only diagnosed the remaining images as the second reader

**eTable 13.** Performance of the Combination of Certified Ophthalmologists and the Retinal Artificial Intelligence Diagnosis System in the Reader Study

|                             | Number of cases | Accuracy (95% CI)   | Specificity [95% CI] | Sensitivity [95% CI] |
|-----------------------------|-----------------|---------------------|----------------------|----------------------|
| Referral DR                 | 447             | 0.992 [0.991-0.994] | 0.998 [0.997-0.999]  | 0.866 [0.831-0.896]  |
| Referral AMD                | 604             | 0.980 [0.977-0.983] | 0.995 [0.993-0.996]  | 0.757 [0.720-0.790]  |
| Referral possible glaucoma  | 608             | 0.982 [0.979-0.984] | 0.997 [0.996-0.998]  | 0.734 [0.697-0.768]  |
| Pathological myopia         | 104             | 0.997 [0.996-0.998] | 0.999 [0.998-0.999]  | 0.837 [0.751-0.902]  |
| Retinal vein occlusion      | 70              | 0.998 [0.997-0.999] | 1.000 [0.999-1.000]  | 0.729 [0.609-0.828]  |
| Macula hole                 | 12              | 1.000 [0.999-1.000] | 1.000 [0.999-1.000]  | 0.833 [0.516-0.979]  |
| Epiretinal macular membrane | 176             | 0.995 [0.994-0.996] | 1.000 [1.000-1.000]  | 0.733 [0.661-0.797]  |
| Hypertensive retinopathy    | 479             | 0.977 [0.974-0.980] | 0.998 [0.997-0.999]  | 0.559 [0.514-0.605]  |
| Myelinated fibers           | 35              | 1.000 [0.999-1.000] | 1.000 [1.000-1.000]  | 0.886 [0.733-0.968]  |
| Retinitis pigmentosa        | 6               | 1.000 [0.999-1.000] | 1.000 [1.000-1.000]  | 0.667 [0.223-0.957]  |

CI: confidence interval, DR: diabetic retinopathy, AMD: age-related macular degeneration.

**eTable 14.** Performance of the Combination of Junior Retinal Specialists and the Retinal Artificial Intelligence Diagnosis System in the Reader Study

|                             | Number of cases | Accuracy (95% CI)   | Specificity [95% CI] | Sensitivity [95% CI] |
|-----------------------------|-----------------|---------------------|----------------------|----------------------|
| Referral DR                 | 447             | 0.995 [0.993-0.996] | 0.999 [0.998-0.999]  | 0.906 [0.875-0.931]  |
| Referral AMD                | 604             | 0.984 [0.981-0.986] | 0.996 [0.995-0.998]  | 0.783 [0.748-0.815]  |
| Referral possible glaucoma  | 608             | 0.987 [0.985-0.989] | 0.999 [0.998-1.000]  | 0.796 [0.762-0.827]  |
| Pathological myopia         | 104             | 0.999 [0.998-0.999] | 1.000 [0.999-1.000]  | 0.865 [0.784-0.924]  |
| Retinal vein occlusion      | 70              | 0.999 [0.998-0.999] | 1.000 [0.999-1.000]  | 0.886 [0.787-0.949]  |
| Macula hole                 | 12              | 1.000 [0.999-1.000] | 1.000 [0.999-1.000]  | 0.833 [0.516-0.979]  |
| Epiretinal macular membrane | 176             | 0.996 [0.995-0.997] | 1.000 [1.000-1.000]  | 0.778 [0.710-0.837]  |
| Hypertensive retinopathy    | 479             | 0.977 [0.974-0.980] | 0.998 [0.997-0.999]  | 0.543 [0.497-0.588]  |
| Myelinated fibers           | 35              | 1.000 [0.999-1.000] | 1.000 [1.000-1.000]  | 0.943 [0.808-0.993]  |
| Retinitis pigmentosa        | 6               | 1.000 [0.999-1.000] | 1.000 [1.000-1.000]  | 0.833 [0.359-0.996]  |

CI: confidence interval, DR: diabetic retinopathy, AMD: age-related macular degeneration.

**eTable 15.** Performance of the Combination of Senior Retinal Specialists and the Retinal Artificial Intelligence Diagnosis System in the Reader Study

|                             | Number of cases | Accuracy (95% CI)   | Specificity [95% CI] | Sensitivity [95% CI] |
|-----------------------------|-----------------|---------------------|----------------------|----------------------|
| Referral DR                 | 447             | 0.995 [0.993-0.996] | 0.999 [0.998-1.000]  | 0.906 [0.875-0.931]  |
| Referral AMD                | 604             | 0.984 [0.982-0.987] | 0.997 [0.996-0.998]  | 0.783 [0.748-0.815]  |
| Referral possible glaucoma  | 608             | 0.989 [0.987-0.991] | 1.000 [0.999-1.000]  | 0.831 [0.798-0.860]  |
| Pathological myopia         | 104             | 0.999 [0.998-0.999] | 1.000 [0.999-1.000]  | 0.885 [0.807-0.939]  |
| Retinal vein occlusion      | 70              | 1.000 [0.999-1.000] | 1.000 [0.999-1.000]  | 0.971 [0.901-0.997]  |
| Macula hole                 | 12              | 1.000 [0.999-1.000] | 1.000 [0.999-1.000]  | 0.833 [0.516-0.979]  |
| Epiretinal macular membrane | 176             | 0.996 [0.994-0.997] | 1.000 [0.999-1.000]  | 0.750 [0.679-0.812]  |
| Hypertensive retinopathy    | 479             | 0.981 [0.978-0.983] | 0.999 [0.998-0.999]  | 0.618 [0.573-0.662]  |
| Myelinated fibers           | 35              | 1.000 [0.999-1.000] | 1.000 [1.000-1.000]  | 0.943 [0.808-0.993]  |
| Retinitis pigmentosa        | 6               | 1.000 [0.999-1.000] | 1.000 [1.000-1.000]  | 0.833 [0.359-0.996]  |

CI: confidence interval, DR: diabetic retinopathy, AMD: age-related macular degeneration.
